1 **Title**

2 Laminin N-terminus  $\alpha$ 31 expression during development in an inducible-transgenic mouse

3 model is lethal and causes a multitude of tissue-specific defects

4

5 **Author names and affiliations**

6 Conor J. Sugden, Valentina Iorio, Lee D. Troughton, Ke Liu, George Bou-Gharios\*, Kevin J.

7 Hamill\*

8

9 \*these authors jointly supervised this work

10

11 **Corresponding author (name and permanent address)**

12 Kevin J Hamill

13 William Henry Duncan Building,

14 University of Liverpool,

15 6 West Derby Street,

16 Liverpool, UK

17 L7 8TX

18

19

## 20 **Abstract**

21 Alternative splicing of the laminin  $\alpha 3$  gene gives rise to a netrin-like protein termed LaNt  
22  $\alpha 31$ , the major structural feature of which is a laminin N-terminal domain. LaNt  $\alpha 31$  is  
23 expressed across a wide range of tissues, is upregulated in cancers, and ex vivo and in vitro  
24 functional studies have indicated that this relatively unstudied protein influences wound  
25 repair, stem cell activity, and tumour progression via modifying matrix organisation.  
26 However, LaNt  $\alpha 31$  functionality has never been investigated in vivo. Here we report the  
27 generation and characterisation of the first LaNt  $\alpha 31$  transgenic mouse line using the  
28 ubiquitin C promoter to drive expression of an expression cassette containing a flox-STOP  
29 sequence, the human LaNt  $\alpha 31$  coding sequence and a tdTomato reporter. This line was  
30 crossed with mice expressing inducible Cre recombinase driven from the Rosa26 locus  
31 (R26CreERT2), and double transgenics were given tamoxifen at E15.5 to induce expression.  
32 LaNt  $\alpha 31$  overexpressing animals were fully formed and intact at birth but were not viable,  
33 exhibiting localised regions of erythema. Histological examination revealed numerous  
34 striking defects including extra-vascular erythrocytes across multiple tissues. Widespread  
35 disorganisation was apparent in the kidney, with epithelial detachment, tubular dilation,  
36 interstitial bleeding observed, and thickening of the kidney tubule basement membranes. In  
37 the skin, mice exhibited disruption of the epidermal basal cell layer and hair follicle outer  
38 root sheath, with evidence of basement membrane interruption in the interfollicular  
39 epidermis. In the liver, there was a ~50% reduction of total cell number, associated with a  
40 depletion of hematopoietic erythrocytic foci. In the lungs, there appeared to be a reduction of  
41 alveolar epithelial cells accompanied by blood interspersed throughout the tissue. Together,  
42 these findings demonstrate that LaNt  $\alpha 31$  can influence tissue morphogenesis during  
43 development and implicate this new protein as a potentially important mediator of basement  
44 membrane assembly.

45

46

47 Keywords (max 6)

48 Laminin, netrin, basement membrane, development

49

## 50 **Abbreviations**

51 LaNt  $\alpha$ 31, laminin N-terminus  $\alpha$ 31; BM, basement membrane; ECM, extracellular matrix;

52 LN, laminin N-terminal; LM, laminin; LE, laminin-type epidermal growth factor-like

53 domain; DMEM, Dulbecco's Modified Eagle Medium; SDS-PAGE sodium dodecyl sulfate

54 polyacrylamide gel electrophoresis; mEFs, mouse embryonic fibroblasts; hK14, human

55 keratin 14; intraperitoneal injection, IP

56

57

## 58 **Introduction**

59           Basement membranes (BMs) are specialised extracellular matrix (ECM) structures  
60 with essential and remarkably diverse roles in most cell and tissue behaviours; including  
61 regulating differentiation, cell adhesion and migration [1, 2]. BMs not only provide the  
62 mechanical attachment points that support sheets of cells to resist stresses but also influence  
63 signalling cascades via direct binding to cell surface receptors, through the sequestration and  
64 controlled release of growth factors, and by providing biomechanical cues, as reviewed in [3,  
65 4]. BMs are also dynamic structures that are remodelled in terms of composition and  
66 structure throughout life, with the most striking changes occurring during development [5, 6].  
67 At the core of every BM are two networks of structural proteins; type IV collagens and  
68 laminins (LMs)[7].

69           Each LM is an obligate  $\alpha\beta\gamma$  heterotrimer formed from one of five  $\alpha$  chains (LAMA1-  
70 5), three  $\beta$  chains (LAMB1-3) and three  $\gamma$  chains (LAMC1-3), with each chain displaying  
71 spatio-temporal distribution patterns, as reviewed in [8-11]. Assembly of LM networks and  
72 higher-order structures involves formation of a ternary node between the laminin N-terminal  
73 (LN) domains of an  $\alpha$ , a  $\beta$  and a  $\gamma$  chain [12, 13]. These ternary  $\alpha\beta\gamma$  nodes assemble in a two-  
74 step process involving an initial rapid formation of unstable  $\beta\gamma$  LN intermediate which is then  
75 stabilised through the incorporation of an  $\alpha$  LN domain [14-17]. The biological importance  
76 of these LN-LN interactions is exemplified by a group of human syndromic disorders where  
77 missense mutations affecting the LN domains of the LAMA2, LAMB2 or LAMA5 genes  
78 give rise to muscular dystrophy in merosin-deficient muscular dystrophy, kidney and ocular  
79 developmental defects in Pierson syndrome, or defects in kidney, craniofacial and limb  
80 development respectively [18-22]. Although these disorders demonstrate that LM network  
81 assembly is essential for homeostasis of numerous tissues, not all LM chains contain an LN  
82 domain. Specifically, LM $\alpha$ 4, which is expressed at high levels in the vasculature, and the

83 LM $\alpha$ 3a and LM $\gamma$ 2 chains, which are abundant in surface epithelium including the skin, have  
84 shortened amino termini which lack this key domain but yet still form functional BMs [8, 9,  
85 23, 24]. This raises questions of whether LN domains are important in all tissue contexts or  
86 whether additional proteins may compensate for the inability of the LMs to form networks.

87         Alongside their main LM transcripts, the LAMA3 and LAMA5 genes produce short  
88 transcripts encoding proteins that are unable to trimerise into LMs but which contain LN  
89 domains [25]. At least one of these laminin N terminus proteins encodes a functional protein,  
90 LaNt  $\alpha$ 31, the structural features of which are an  $\alpha$  LN domain followed by a short stretch of  
91 laminin-type epidermal growth factor-like (LE) domains and unique C-terminal region with  
92 no conserved domain architecture. In addition to the LaNt proteins, the laminin-superfamily  
93 includes netrin genes which encode proteins with either  $\beta$  or  $\gamma$  LN domains, stretches of LE  
94 repeats and unique C-terminal regions (as reviewed in [26]. Moreover, proteolytic processing  
95 of LMs are also released from LM $\alpha$ 1 [27], LM $\beta$ 1 [28], LM $\alpha$ 3b [29]. Each of these LN  
96 domain-containing proteins and cryptic fragments have cell surface receptor binding  
97 capabilities and can act as signalling molecules (reviewed in [30]. However, netrin-4, which  
98 evolved independently from the other netrins [31, 32], also has LM-network disrupting  
99 capabilities [33, 34], and when overexpressed in vivo, caused increased lymphatic  
100 permeability [35]. Netrin-4 LN domain has greatest homology with LM  $\beta$  LN domains  
101 whereas LaNt  $\alpha$ 31 contains the LM $\alpha$ 3b LN domain [36]; therefore, although LaNt  $\alpha$ 31 could  
102 act similarly to these proteins, it likely plays a different role depending on the LM context.

103         LaNt  $\alpha$ 31 is expressed in the basal layer of epithelia in the skin [25], cornea [37] and  
104 digestive tract, the ECM around terminal duct lobular units of the breast and alveolar air sacs  
105 in the lung, and is widely expressed by endothelial cells [38]. Increased expression is  
106 associated with breast ductal carcinoma and in vitro overexpression leads to a change in the  
107 mode of breast cancer cell invasion through LM-rich matrices [39]. LaNt  $\alpha$ 31 is also

108 transiently upregulated during re-epithelialization ex vivo burn wounds and in stem cell  
109 activation assays [37]. In epidermal and corneal keratinocytes, knockdown or overexpression  
110 experiments revealed that modulating LaNt  $\alpha$ 31 levels leads to reduced migration rates and  
111 modifying cell-to-matrix adhesion [25, 40]. Consistent with a role in matrix assembly,  
112 increased expression LaNt  $\alpha$ 31 causes striking changes to LM332, including formation tight  
113 clusters beneath cells and increasing the proteolytic processing of LM $\alpha$ 3 by matrix  
114 metalloproteinases [40]. Although these findings all support LaNt  $\alpha$ 31 as being a mediator of  
115 cell behaviour, it is as yet unknown what role it plays in complex in vivo tissue environments  
116 and in particular in matrixes that are actively being remodeled.

117 Here, we present the first in vivo study of LaNt  $\alpha$ 31 overexpression in newly  
118 developed mouse models.

119

## 120 **Results**

### 121 **Inducible LaNt $\alpha$ 31 construct validation.**

122 To investigate the consequences of LaNt  $\alpha$ 31 overexpression in vivo, we generated an  
123 inducible system for conditional LaNt  $\alpha$ 31 transgene expression (figure 1A). An expression  
124 construct was created containing the ubiquitin C promoter driving expression of the human  
125 LaNt  $\alpha$ 31 cDNA with the native secretion signal replaced by mouse immunoglobulin  $\kappa$  leader  
126 sequence to maximise secretion, and with sequences for Flag and HA epitope tags added to the  
127 C-terminus of the LaNt  $\alpha$ 31 coding region. A T2A element was included to enable expression  
128 of tdTomato from the same transgene but not directly fused to LaNt  $\alpha$ 31 [46]. A floxed stop-  
129 cassette was inserted between the promoter and the start of the construct to prevent transgene  
130 expression until Cre-mediated removal of this cassette. The entire construct was flanked with  
131 the cHS4  $\beta$ -globin insulator to protect against chromatin-mediated gene silencing [52] (figure  
132 1A). Restriction enzyme digests and plasmid sequencing confirmed the assembled pUbc-  
133 LoxP-LaNt $\alpha$ 31-T2A-tdTomato plasmid.

134 To confirm the construct expressed only following exposure to Cre recombinase, the  
135 pUbc-LoxP-LaNt $\alpha$ 31-T2A-tdTomato was co-transfected alongside pCAG-Cre:GFP,  
136 encoding GFP-tagged Cre recombinase, into HEK293A cells. tdTomato signal was observed  
137 only in cells transfected with both plasmids (figure 1B). PCR using primers flanking the  
138 STOP cassette also confirmed that the cassette was removed only in cells transfected with  
139 both plasmids (figure 1C). Western blotting using polyclonal anti-Flag antibodies confirmed  
140 expression of the predicted ~ 57 kDa band in co-transfected cell lysates (figure 1D), this also  
141 confirmed that the T2A element was cleaved in the final product releasing the tdTomato tag.  
142 Together, these results demonstrate that the pUbc-LoxP-LaNt $\alpha$ 31-T2A-tdTomato plasmid  
143 allows for the Cre-inducible expression of LaNt  $\alpha$ 31 and tdTomato.

144

145 **Generation and validation of a novel LaNt  $\alpha$ 31 overexpressing mouse line.**

146 The pUbC-LoxP-LaNt $\alpha$ 31-T2A-tdTomato construct was linearised, and transgenic F0  
147 mice generated by pronuclear microinjection into oocytes. To confirm transgene expression,  
148 F0 mice were mated with WT (C57BL/6J) mice, embryos were collected at E11.5, and mEFs  
149 were isolated from the embryos. Presence of the UbC-LoxP-LaNt $\alpha$ 31-T2A-tdTomato  
150 transgene (hereafter UbCLaNt) was confirmed by PCR (figure 2A). mEFs were transduced  
151 with an adenovirus encoding codon-optimised Cre recombinase (ad-CMV-iCre). Analysis by  
152 immunoblotting with anti-HA-antibodies (figure 2B) revealed a ~57 KDa band and  
153 fluorescence microscopy confirmed tdTomato expression (figure 2C) in samples containing  
154 both the UbC-LaNt transgene and the ad-CMV-iCre, but not in cells with either plasmid  
155 individually.

156 Male UbCLaNt mice were mated with females from the tamoxifen-inducible  
157 ubiquitous Cre line R26CreERT2 (figure 3A). Transgene expression was induced by IP of  
158 tamoxifen at E13.5, and embryos collected at E19.5. PCR confirmed that Cre/LoxP mediated  
159 recombination only occurred in the embryos with both the UbCLaNt and the R26CreERT2  
160 (figure 3B). Explants were generated from the skin of these embryos, and only the explants  
161 grown from double transgenic embryos exhibited tdTomato expression by fluorescence  
162 microscopy (figure 3C) and HA-tagged LaNt  $\alpha$ 31 expression by western immunoblotting  
163 (figure 3D). Together, these data confirmed the generation of tamoxifen-inducible LaNt  $\alpha$ 31  
164 overexpressing mouse line, without detectable leakiness (UbCLaNt::R26CreERT2).

165

166 **UbCLaNt::R26CreERT2 expression in utero causes death and localised regions of**  
167 **erythema at birth.**

168 To determine the impact of LaNt  $\alpha$ 31 during development where extensive BM  
169 remodelling occurs, tamoxifen was administered via IP to pregnant UbCLaNt::R26CreERT2



170 mice at E15.5 and pregnancies allowed to continue to term. Across two litters from different  
171 mothers, two from six pups and three from five pups respectively were intact but not viable at  
172 birth, while the remaining littermates were healthy. The non-viable pups displayed localised  
173 regions of erythema with varying severity between the mice, but were otherwise fully  
174 developed and the same size as littermates (figure 4A). Genotyping identified that all  
175 offspring possessed both the UbCLa $\alpha$ Nt and R26CreERT2 transgenes (figure 4B). Hereafter,  
176 non-viable pups are referred to as UbCLa $\alpha$ Nt::R26CreERT2 1E1, 1E2, 2E1, 2E2, 2E3, and  
177 viable pups UbCLa $\alpha$ Nt::R26CreERT2 2NE1, 2NE2. To confirm transgene expression, skin  
178 explants were established from non-viable pups, and tdTomato fluorescence was confirmed  
179 by microscopy (figure 4C). Consistent with the fluorescence data, western immunoblot  
180 analysis of total protein extracts from the explanted cells and whole embryo lysates revealed  
181 transgene expression in non-viable pups, although expression levels varied between the mice  
182 (figure 4D). To further confirm transgene expression within tissues, OCT-embedded skin  
183 sections of UbCLa $\alpha$ Nt::R26CreERT2 were processed with anti-mCherry antibodies which  
184 recognise the tdTomato protein, revealing that only the non-viable pups expressed the  
185 tdTomato reporter (figure 4E). Together these data confirm that only non-viable mice  
186 expressed the LaNt  $\alpha$ 31 transgene

187 To identify LaNt  $\alpha$ 31 effects at the tissue level, the pups were formalin-fixed and  
188 paraffin-embedded then processed for H&E and immunohistochemistry. All organs were  
189 present in the mice and appeared intact at the macroscopic level; however, blood exudate was  
190 observed throughout multiple tissues in all of the LaNt  $\alpha$ 31 transgene expressing mice. We  
191 focused our attention on kidney, skin and lung as examples of tissues where the BMs with  
192 differences in LM composition and where we hypothesised LaNt  $\alpha$ 31 could, therefore, elicit  
193 distinct effects. Specifically, the predominant LMs in the kidney contain three LN domains,  
194 and mutations affecting LM polymerisation lead to Pierson syndrome [19, 53-56], whereas

195 the major LM in the skin contains one LN domain, LM332, and loss of function leads to skin  
196 fragility, reviewed in [57], and granulation tissue disorders [58, 59]. In the lung, LM311, a  
197 two LN domain LM, is enriched [60, 61] and absence of LM $\alpha$ 3 is associated with pulmonary  
198 fibrosis [62]. Each of these three tissues also express LaNt  $\alpha$ 31 in adult human tissue, and  
199 are, therefore, tissues where dysregulation of expression regulation could be physiologically  
200 relevant [38].

201

202 **LaNt  $\alpha$ 31 overexpression leads to epithelial detachment, tubular dilation and interstitial**  
203 **bleeding in the kidney.**

204 In the kidneys, striking alterations were observed in the renal tubules, pelvis, and  
205 blood vessels of UbCLaNt::R26CreERT2 mice expressing the transgene. Specifically,  
206 dilation and detachment of the lining epithelia in collecting ducts and uteric bud segments  
207 was evident (figure 5, black arrows), and changes were observed in the vessels of the kidney,  
208 with bleeding into the interstitial and subtubular surroundings (figure 5, yellow arrows).  
209 There was some severity in the extent of the defects between the expressing pups (interstitial  
210 bleeding 4 out of 5 mice, pelvic dilation 2 out of 5, epithelial detachment and tubular  
211 observed in all mice). Indirect IF processing of tissue using antibodies raised against LM111  
212 revealed LM localisation to be unchanged, however immunoreactivity of the tubule BMs was  
213 thickened in the expressing pups compared with littermate controls (figure 6).

214

215 **LaNt  $\alpha$ 31 overexpression disrupts epithelial basal cell layer organisation.**

216 Histological examination of the dorsal skin of UbCLaNt::R26CreERT2 mice revealed  
217 localised disruption of the epidermal basal cell layer, with a loss of the tight cuboidal  
218 structure of the stratum basale (figure 7A). Basal layer disruption was also observed in the  
219 outer root sheath of the hair follicles (figure 7A). Although no evidence of blistering at the

220 dermal-epidermal junction was observed Mice expressing the LaNt  $\alpha$ 31 transgene displayed  
221 discontinuous LM immunoreactivity at the epidermal-dermal junction (figure 7B). However,  
222 the LM surrounding the outer root sheath was unaffected (figure 7B)..

223

#### 224 **Mice expressing the LaNt $\alpha$ 31 transgene display structural differences in the lung.**

225 Lungs of P0 mice were not inflated prior to FFPE, however structural differences  
226 between non-expressing and expressing mice were apparent. Specifically, in mice expressing  
227 LaNt  $\alpha$ 31, fewer, less densely packed alveolar epithelial cells were observed. Additionally,  
228 and similarly to the kidney, erythrocytes were present throughout the lung tissue. (figure 8).

229

#### 230 **LaNt $\alpha$ 31 overexpression leads to a reduction of hematopoietic colonies in the liver.**

231 Surprisingly, drastic and obvious superficial changes were apparent in the livers of  
232 mice expressing the LaNt  $\alpha$ 31 transgene compared to the non-expressing mice. Although the  
233 bile ducts, sinusoid endothelium and hepatocyte morphology were unchanged, there was a  
234 clear reduction in hematopoietic foci in the LaNt  $\alpha$ 31 transgene expressing animals (figure  
235 9A). This reduction corresponded to a >48% reduction of total cell number (WT= 11.5  
236 nuclei/mm<sup>2</sup>, mean NE = 11.4 nuclei/ mm<sup>2</sup>, mean E= 5.8 nuclei/mm<sup>2</sup>; figure 9B).

237

#### 238 **Keratin 14-driven constitutive LaNt $\alpha$ 31 induces a low offspring number.**

239 We next used a keratin-14 promoter (K14) to restrict expression to skin and the  
240 epithelia of tongue, mouth, forestomach, trachea, thymus and respiratory and urinary tracts  
241 [63-65]. K14 promoter activity has also been described in the oocyte [66]. The new construct  
242 used the human K14 promoter drive expression of human LaNt  $\alpha$ 31, followed by a T2A  
243 element and a mCherry reporter (supplemental figure 1A) and was validated by transfecting  
244 into KERA 308 mouse epidermal keratinocytes and visualising the mCherry fluorescence

245 (supplemental figure 1B) and immunoblotting for the LaNt  $\alpha$ 31 protein (supplemental figure  
246 1C).

247 K14-LaNt $\alpha$ 31 transgenic mice were generated by pronuclear microinjection.

248 However, unusually small litters were obtained from recipient CD1 mothers and mice

249 containing the transgene DNA (supplemental figure 1D) did not express the transgene at the

250 protein level (supplemental figure 1F-G). The unusually low offspring sizes, combined with

251 the lack of protein expression in genotype-positive mice, suggests that expression of LaNt

252  $\alpha$ 31 under the control of the K14 promoter is lethal during development.

## 253 Discussion

254 This study has demonstrated that LaNt  $\alpha$ 31 overexpression ubiquitously during  
255 development is embryonically lethal and causes an array of tissue specific-defects. These  
256 include blood exudate throughout most tissues as well as striking changes to the tubules of  
257 the kidney and the basal layer of the epidermis, depletion of hematopoietic colonies in the  
258 liver, and evidence of BM disruption was apparent at the dermal-epidermal junction. These  
259 findings build upon in vitro and ex vivo work that have implicated LaNt  $\alpha$ 31 in modulating  
260 cell adhesion, migration, and LM deposition [25, 37, 40], and for the first time demonstrates  
261 that this little-known LAMA3-derived splice isoform plays a role in BM and tissue  
262 homeostasis during development.

263 As LM network assembly requires binding of an  $\alpha$ ,  $\beta$  and  $\gamma$  LN domain [14-17, 67],  
264 we predicted that the presence of an  $\alpha$  LN domain within LaNt  $\alpha$ 31 would influence LM-LM  
265 interactions and therefore BM assembly or integrity. Consistent with this hypothesis, much of  
266 the UbCLaNt::R26CreERT2 mice phenotypes resemble those from mice where LM networks  
267 cannot form due either to LN domain mutations or overexpression of the LM-network  
268 disrupting protein, netrin-4. Specifically, mice with a mutation in the LN domain of LM  $\alpha$ 5  
269 die before birth exhibiting defective lung development and vascular abnormalities in the  
270 kidneys [68]. While mice with LM  $\beta$ 2 LN domain mutations or LN domain deletions exhibit  
271 renal defects, and although viable at birth, become progressively weaker and die between  
272 postnatal day 15 and 30 [69-74]. Additionally, mice with netrin-4 overexpression under the  
273 control of the K14 promoter were born smaller, redder, and with increased lymphatic  
274 permeability [35]. In comparison to each of these lines, the LaNt  $\alpha$ 31 animals present with  
275 similar but more severe and more widespread phenotypes, which reflects the more  
276 widespread UBC and R26 promoter activities. Nevertheless, based on the broad similarity  
277 between these phenotypes, we propose a model where LaNt  $\alpha$ 31 overexpression inhibits LM

278 network assembly by competing with the native LM  $\alpha$  chain. However, within this model,  
279 there remains the question of how LaNt  $\alpha$ 31 influences tissues where there the expressed  
280 LMs do not contain an  $\alpha$  LN domain, and therefore are not able to polymerise [16]. For  
281 example, The LM composition present within vessel BMs during development and lymph  
282 vessels is rich in the  $\beta$  and  $\gamma$  LN domain-containing LM411 [75-77]. Here, one might have  
283 anticipated that the LaNt  $\alpha$ 31 LN domain could stabilise weak  $\beta\gamma$  LN dimers strengthening  
284 the BM but the observed phenotype of blood exudate throughout the mouse tissues suggests  
285 instead that the LaNt  $\alpha$ 31 transgenics have vascular leakage which overall points to a  
286 disruptive rather than stabilising role.

287         Although the in vivo findings presented here along with previous in vitro studies both  
288 strongly support LaNt  $\alpha$ 31 acting as a regulator of BM homeostasis we cannot fully rule out  
289 the possibility of LaNt  $\alpha$ 31 acting as a signalling protein [25, 37, 39, 40]. Specifically,  
290 integrin-mediated signalling from LaNt  $\alpha$ 31-like proteolytically released LN-domain  
291 containing fragments from LM  $\alpha$ 3b,  $\alpha$ 1, and  $\beta$ 1 chains have been reported [27-29] and some  
292 aspects of the UbCLaNt::R26CreERT2 phenotype are consistent with LaNt  $\alpha$ 31 acting in this  
293 way. For example one of the most striking phenotypes observed in the  
294 UbCLaNt::R26CreERT2 mice was the depletion of hematopoietic colonies in the liver, an  
295 essential stem cell niche during development [78-80]. Integrins  $\alpha$ 6 and  $\beta$ 1 are highly  
296 expressed in hematopoietic stem cells, and are central to the process of migration both in and  
297 out of the fetal liver [81-83], and a netrin-4/laminin  $\gamma$ 1 complex has been shown to signal  
298 through the integrin  $\alpha$ 6 $\beta$ 1 receptor [84]. Indeed, LaNt  $\alpha$ 31 may signal in a similar manner,  
299 which may be detrimental to the maintenance of hematopoietic colonies in the fetal liver.  
300 However, altering LM network structural organisation also changes outside-in signalling,  
301 through direct changes to the presentation of ligands, and through modifying BM growth  
302 factor sequestration or release [85]. LMs networks are also critical for maintaining progenitor

303 cell “stemness” [86-89]. Intriguingly, we previously identified that LaNt  $\alpha$ 31 is enriched in  
304 limbal stem cell niche of adult corneas and that expression was further upregulated upon ex  
305 vivo stem cell activation or during wound repair [37]. Coupled to the striking phenotype  
306 observed here, it is tempting to hypothesise that LaNt  $\alpha$ 31 is either directly or indirectly  
307 involved in regulating stem cell quiescence.

308 In the present study, expression was induced during development to focus expression  
309 to times when basement membrane remodelling is highly active and thereby maximising the  
310 opportunity to observe a phenotype. Considering the widespread expression of LaNt  $\alpha$ 31  
311 [38], and the dramatic effects observed in this study, it will be interesting to determine effects  
312 in adult animals. For example, LM network integrity is critical to muscle function, with LM  
313  $\alpha$ 2 LN domain mutations or deletions developing muscular dystrophy and peripheral  
314 neuropathy over time [90-92], therefore although no overt muscle phenotype was observed in  
315 the new-born LaNt  $\alpha$ 31 transgenic animals, longer-term studies may reveal further  
316 phenotypes once tissues are placed under stress. As the LaNt  $\alpha$ 31 phenotypes are deleterious,  
317 further studies will require lineage-specific expression to gain deeper cellular and temporal  
318 resolution.

319 This study provides the first in vivo evidence that LaNt  $\alpha$ 31, the newest member of  
320 the LM superfamily, is a biologically relevant matricellular protein and further emphasises  
321 the importance of LN domains as regulators of tissue homeostasis. Importantly, while  
322 disease-causing LN domain mutations are rare in normal biology, changes to alternative  
323 splicing events often occur in normal situations, including development and wound repair,  
324 and in pathological situations including cancer [93-95]. Taken together, these findings have  
325 exciting and potentially far reaching implications for our understanding of BM biology.  
326

327 **Methods**

328 **Ethics**

329 All procedures were licensed by the UK Home Office under the Animal (Specific  
330 Procedures) Act 1986, project license numbers (PPL) 70/9047 and 70/7288. All mice were  
331 housed and maintained within the University of Liverpool Biological Services Unit in  
332 specific pathogen-free conditions in accordance with UK Home Office guidelines. Food and  
333 water were available ad libitum.

334

335 **Antibodies**

336 Rabbit monoclonal antibodies against the influenza hemagglutinin epitope (HA)  
337 (C29F4, Cell Signalling Technology, Danvers, MA) were used for immunoblotting at 67  
338 ng/ml. Goat polyclonal antibodies against DDDDK (equivalent to FLAG sequence, ab1257,  
339 Abcam, Cambridge, UK), rabbit polyclonal antibodies against 6X-His (ab137839, Abcam),  
340 and rabbit polyclonal antibodies against lamin A/C (4C11, Cell Signalling Technology) were  
341 used at 1 µg/ml for immunoblotting. Mouse monoclonal antibodies against LaNt  $\alpha$ 31 [37]  
342 were used at 0.225 µg/ml for immunoblotting. Rabbit polyclonal antibodies against mCherry  
343 (ab183628, Abcam) were used at 2.5 µg/ml for immunofluorescence. Alexa fluor 647  
344 conjugated goat anti-rabbit IgG recombinant secondary antibodies, were obtained from  
345 Thermo Fisher Scientific (Waltham, MA, United States) and used at 2 µg/ml for indirect  
346 immunofluorescence microscopy.

347

348 **pUbC-LoxP-LaNt $\alpha$ 31-T2A-tdTomato**

349 A gBlock was synthesised (Integrated DNA Technologies, Coralville, IA) containing  
350 *NdeI* and *NdeI* restriction enzyme sites, T7 promoter binding site [41], Kozak consensus  
351 sequence [42], Igk secretion signal (METDTLLLWVLLLWVPGSTGD) [43], LaNt  $\alpha$ 31-



352 encoding cDNA (amino acids 38-488) [25], Flag (DYKDDDDK) [44] and HA  
353 (YPYDVPDYA) [45] tag sequences, T2A sequence (EGRGSLTTCGDVEENPGP) [46], and  
354 *BamHI*. The gBlock DNA was inserted into pCSCMV:tdTomato (a gift from Gerhart Ryffel,  
355 Addgene plasmid #30530 ; <http://n2t.net/addgene:30530>; RRID:Addgene\_30530) using *NdeI*  
356 and *BamHI* (New England Biolabs, Ipswich, MA), to produce pCS-LaNt $\alpha$ 31-T2A-tdTomato.  
357 LaNt $\alpha$ 31-T2A-tdTomato was then removed from this backbone using *NheI* and *EcoRI*, and  
358 inserted into a vector containing the Ubiquitin C (UbC) promoter and a floxed stop cassette,  
359 all flanked by cHS4 insulator elements, producing pUbC-LoxP-LaNt $\alpha$ 31-T2A-tdTomato.  
360

### 361 **hK14-LaNt $\alpha$ 31**

362 Full length LaNt  $\alpha$ 31 cDNA was amplified by PCR and inserted into pSecTag vector  
363 (Thermo Fisher Scientific), introducing Ig $\kappa$  leader sequence 5' of the LaNt  $\alpha$ 31 sequence, and  
364 Myc and 6x His tags 3' of the LaNt  $\alpha$ 31 sequence. The complete Ig $\kappa$ -LaNt  $\alpha$ 31-Myc-His  
365 sequence was inserted into pGEM $\oplus$ -5Zf(+) vector (Promega, Madison, WI) using *NheI* and  
366 *PmeI* (New England Biolabs), producing pGEM $\oplus$ -5Zf(+)-LaNt  $\alpha$ 31. Separately, the  
367 sequence encoding human keratin 14 (hk14) promoter was amplified by PCR, using primers  
368 introducing *MluI* 5' and *NdeI*, *NsiI* 3' of the sequence, and this was inserted into a bicistronic  
369 vector containing the mCherry sequence, producing phK14-mCherry. Finally, Ig $\kappa$ -LaNt $\alpha$ 31-  
370 Myc-His was excised from pGEM $\oplus$ -5Zf(+)-LaNt $\alpha$ 31 using *NdeI* and *NsiI* (New England  
371 Biolabs) and inserted into phK14-mCherry, to produce phK14-LaNt $\alpha$ 31-T2A-mCherry.

372

### 373 **Cloning procedures**

374 Restriction digests were set up with 1  $\mu$ g of plasmid DNA, 1  $\mu$ g of PCR product, or  
375 100 ng of gBlock DNA, 20 U of each enzyme and CutSmart buffer (50 mM Potassium  
376 Acetate, 20 mM Tris-acetate, 10 mM magnesium acetate, 100  $\mu$ g/ml BSA (New England

377 Biolabs) and incubated at 37°C for 1 h. Enzymatic activity was inactivated by 20 min  
378 incubation at 65°C. PCR or cloning products were separated using 1 % (w/v) agarose gels  
379 (Thermo Fisher Scientific) dissolved in 1 x TAE electrophoresis buffer (40 mM Tris pH 7.6,  
380 20 mM acetic acid, 1 mM EDTA) containing ethidium bromide, and visualised using a UV  
381 transilluminator ChemiDoc MP System (BioRad, Hercules, CA). DNA bands of the correct  
382 sizes were excised from the gel and purified using GenElute™ Gel Extraction Kit, following  
383 manufacturer's protocol (Sigma Aldrich, St. Louis, Missouri, United States). Purified inserts  
384 were ligated into vectors at 3:1 molar ratios, either using Instant Sticky-end Ligase Master  
385 Mix (New England Biolabs) following manufacturers protocol, or using 400 U of T4 DNA  
386 ligase and 1X reaction buffer (50 mM Tris-HCl, 10 mM MgCl<sub>2</sub> 1 mM ATP, 10 mM DTT,  
387 New England Biolabs) at 16°C overnight, followed by enzymatic inactivation at 65°C for 10  
388 min. Ligated DNA was heat-shock transformed into One-Shot TOP10 chemically competent  
389 E. coli cells (Thermo Fisher Scientific) following manufacturer's protocol, then plated onto  
390 LB plates containing the appropriate antibiotic (100 µg/ml ampicillin, 50 µg/ml kanamycin or  
391 25 µg/ml chloramphenicol, Sigma Aldrich). Plasmid DNA was extracted from bacteria using  
392 GenElute™ Plasmid Miniprep Kit (Sigma Aldrich), following the manufacturer's protocol.  
393 Plasmids were sequenced by DNaseq (University of Dundee, Dundee, UK).

394

## 395 **Cell Culture**

396 KERA-308 murine epidermal keratinocyte cells [47], were purchased from CLS (Cell  
397 Lines Service GmbH, Eppelheim, Germany) and maintained in high glucose (4.5 g/L)  
398 Dulbecco's Modified Eagle Medium (DMEM, Sigma Aldrich) supplemented with 10% foetal  
399 calf serum (LabTech, East Sussex, UK) and 2 mM L-glutamine (Sigma Aldrich). HEK293A  
400 cells were maintained in DMEM supplemented with 10 % FCS and 4 mM L-glutamine.

401

## 402 **Cell Transfections**

403 1 x 10<sup>4</sup> KERA-308 or 4 x 10<sup>5</sup> HEK293A cells were seeded in 6-well plates (Greiner-  
404 BioOne, Kremsmünster, Austria) 24 h prior to transfection. For KERA-308 cells, 2 µg of  
405 hK14-LaNtα31-T2A-mCherry or LaNt-α31-pSec-Tag and 2 µl Lipofectamine 2000 (Thermo  
406 Fisher Scientific) were used. For HEK293A cells, either 1 µg pCAG-Cre:GFP and 2 µl  
407 Lipofectamine 2000, 2 µg of pUbc-LoxP-LaNtα31-T2A-tdTomato and 5 µl Lipofectamine  
408 2000, or 2 µg of pUbc-LoxP-LaNtα31-T2A-tdTomato, 1 µg of pCAG-Cre:GFP and 7 µl  
409 Lipofectamine 2000 (Thermo Fisher Scientific), were mixed with 2 ml of Gibco™ Opti-  
410 MEM™ Reduced Serum Medium (Thermo Fisher Scientific) and incubated for 10 min at  
411 room temperature. The DNA-lipofectamine complex was added to the wells, and the media  
412 was replaced with DMEM high glucose after 6 h.

413

## 414 **Explant culture method**

415 Hair was removed from mouse skin tissue using Veet hair removal cream (Reckitt  
416 Benckiser, Slough, UK) and the skin washed in Dulbecco's Phosphate Buffered Saline  
417 (DPBS) containing 200 U/ml penicillin, 200 U/ml streptomycin, and 5 U/ml amphotericin B1  
418 (all Sigma Aldrich). The skin was then dissected into 2-3 mm<sup>2</sup> pieces using a surgical scalpel  
419 and 3 or 4 pieces placed per well of a 6-well dish (Greiner Bio-One, Kremsmünster, Austria)  
420 with the dermis in contact with the dish. 300 µl of DMEM supplemented with 20% FCS, 2  
421 mM L-glutamine, 200 µg/ml penicillin, 200 µg/ml streptomycin, and 5 µg/ml fungizone (all  
422 Sigma Aldrich) was added to the wells. After 24 h, each well was topped up with 1 ml of  
423 media, and the media was replenished every 48 h thereafter.

424

## 425 **Transgenic Line establishment**

426           Generation of transgenic mice were carried out based on the protocol described in  
427 [48]. C57Bl6CBAF1 females (Charles River Laboratories, Margate, Kent, UK) between 6-8  
428 weeks were superovulated by intraperitoneal (IP) injections of 5 IU pregnant mare's serum  
429 gonadotrophin (PMSG; in 100µl H<sub>2</sub>O), followed 46 h later by 5 IU of human chorionic  
430 gonadotropin (hCG, Sigma Aldrich). Treated females were mated with C57Bl6CBAF1 males  
431 overnight. Mated females were identified from the presence of copulation plugs,  
432 anaesthetised, and oviducts removed and dissected in M2 media (Millipore, Watford, UK).  
433 Day-1 oocytes (C57BL/6Jx CBA F1) were transferred into clean media by mouth pipetting.  
434 Cumulus cells were removed by hyaluronidase (300 µg/ml, Merck, Darmstadt, Germany)  
435 treatment in M2 media with gentle shaking until detached from the egg surface. Oocytes were  
436 then rinsed and transferred to M16 media (Millipore, Speciality Media, EmbryoMax) ready  
437 for injection.

438           DNA was diluted to a final concentration of 2 ng/µl in embryo water (Sigma Aldrich)  
439 and filter-purified using Durapore-PVDF 0.22 µM centrifuge filters (Merck). Injection  
440 pipettes were used to pierce the outer layers of the oocyte and to inject DNA. DNA was  
441 injected into the pronuclei of the oocyte. Undamaged eggs were transferred to clean M16  
442 media and incubated at 37 °C until transferred into pseudopregnant CD1 females on the same  
443 day. Meanwhile, pseudopregnant females were obtained by mating vasectomised CD1 males  
444 overnight. Copulation plugs were checked and females were used 1 day post-coitum. Females  
445 were anaesthetised by inhalation of isoflurane (Sigma Aldrich). 30 injected oocytes were  
446 transferred to plugged pseudopregnant female oviducts through the infundibulum.

447           In generating the pUbC-LoxP-LaNtα31-T2A-tdTomato line, 460 mouse zygotes were  
448 injected over four sessions. 87% of these zygotes survived and were transferred into 11  
449 recipient CD1 mothers. From these mothers, 42 pups were born. Of the 10 F0 mice that gave

450 a positive genotype result, four passed on the transgene to the F1 generation. Mice that did  
451 not pass on the transgene to the F1 generation were culled, the four F0 mice were mated to  
452 expand colonies for cryopreservation, and one line was continued for investigation.

453 For K14-LaNt $\alpha$ 31 transgenic mice, 140 embryos were transferred into five recipient  
454 CD1 mothers. Three small litters were born, totalling seven pups. two pups possessed the  
455 transgene, and these were mated to generate F1 mice.

456 R26CreERT2 (Jax Lab 008463) [49] mice were purchased from The Jackson  
457 Laboratory (Bar Harbor, Maine, United States).

458

### 459 **In Vivo Transgene Induction**

460 Tamoxifen (Sigma Aldrich) was dissolved in corn oil (Sigma Aldrich) and  
461 administered via IP at a concentrations of 25 mg/kg or 75 mg/kg. Progesterone (Sigma  
462 Aldrich) was dissolved in corn oil (Sigma Aldrich) and was co-administered alongside  
463 tamoxifen at a dose of exactly half of the corresponding tamoxifen dose (12.5 mg/kg or 25  
464 mg/kg).

465

### 466 **DNA Extraction**

467 Four weeks after birth, ear notches were collected from mouse pups and digested in  
468 100  $\mu$ l lysis buffer (50 mM Tris-HCl pH 8.0, 0.1 M NaCl, 1% SDS, 20 mM EDTA) and 10  
469  $\mu$ l of proteinase K (10 mg/ml, all Sigma Aldrich) overnight at 55°C. The following day,  
470 samples were cooled, spun at 13,000 rpm for 3 min and the supernatant transferred to clean  
471 1.5 ml tubes (Eppendorf, Hamburg, Germany). An equal volume of isopropanol (Sigma  
472 Aldrich) was added, gently inverted and span at 13,000 rpm, and supernatant discarded.  
473 Pellets were washed with 500  $\mu$ l of 70 % EtOH (Sigma Aldrich), then air-dried for 10 min,  
474 and resuspended in 50  $\mu$ l ddH<sub>2</sub>O.

475

## 476 **PCR**

477 50 ng of genomic DNA was mixed with 12.5  $\mu$ l of REDtaq ReadyMix PCR Reaction  
478 Mix (20 mM Tris-HCl pH 8.3, 100 mM KCl, 3 mM MgCl<sub>2</sub>, 0.002 % gelatin, 0.4 mM dNTP  
479 mix, 0.06 unit/ml of Taq DNA Polymerase, Sigma Aldrich) and 0.5  $\mu$ M of each primer;  
480 ddH<sub>2</sub>O was added to make the reaction mixture up to 25  $\mu$ l. Primer pairs for genotyping were  
481 as follows: LaNt  $\alpha$ 31 to tdTomato Forward 5' –ATCTATGCTGGTGGAGGGGT – 3',  
482 Reverse 5' – TCTTTGATGACCTCCTCGCC – 3'; Cre Forward 5' –  
483 GCATTACCGGTCGATGCAACGAGTGATGAG – 3', Reverse 5' –  
484 GAGTGAACGAACCTGGTCGAAATCAGTGCG – 3'; Recombination Forward 5' –  
485 TCCGCTAAATTCTGGCCGTT – 3', Reverse 5' – GTGCTTTCCTGGGGTCTTCA – 3' (all  
486 from Integrated DNA Technologies). Cycle conditions were as follows: Genotyping – 1 cycle  
487 of 95 °C for 5 min, 35 cycles of 95 °C for 15 s; 56 °C for 30 s; 72 °C for 40 s, followed by a  
488 final cycle of 72 °C for 5 min. For checking recombination: 1 cycle of 95 °C for 5 min, 35  
489 cycles of 95 °C for 15 s; 60 °C for 30 s; 72 °C for 90 s, followed by a final cycle of 72 °C for  
490 7 min. PCR products were separated by gel electrophoresis and imaged using a BioRad Gel  
491 Doc XR+ System.

492

## 493 **SDS-PAGE and western immunoblotting**

494 Cells were homogenized by scraping into 90  $\mu$ L Urea/SDS buffer: 10 mM Tris-HCl  
495 pH 6.8, 6.7 M urea, 1 % w/v SDS, 10 % v/v glycerol and 7.4  $\mu$ M bromophenol blue,  
496 containing 50  $\mu$ M phenylmethanesulfonyl fluoride (PMSF) and 50  $\mu$ M N-methylmaleimide (all  
497 Sigma Aldrich). Lysates were sonicated and 10 % v/v  $\beta$ -mercaptoethanol (Sigma Aldrich)  
498 added. Proteins were separated by sodium dodecyl sulfate-polyacrylamide gel electrophoresis  
499 (SDS-PAGE) using 10 % polyacrylamide gels; 1.5 M Tris, 0.4 % w/v SDS, 10 % acrylamide/

500 bis-acrylamide (all Sigma Aldrich), electrophoresis buffer; 25 mM tris-HCl, 190 mM glycine,  
501 0.1 % w/v SDS, pH 8.5 (all Sigma Aldrich). Proteins were transferred to a nitrocellulose  
502 membrane using the TurboBlot™ system (BioRad) and blocked at room temperature in  
503 Odyssey® TBS-Blocking Buffer (Li-Cor BioSciences, Lincoln, NE, United States) for 1 h.  
504 The membranes were probed overnight at 4 °C diluted in blocking buffer, washed 3 x 5 min  
505 in PBS with 0.1 % Tween (both Sigma Aldrich) and probed for 1 h at room temperature in  
506 the dark with IRDye® conjugated secondary Abs against goat IgG (800CW) and rabbit IgG  
507 (680CW), raised in goat or donkey (LiCor BioSciences), diluted in Odyssey® TBS-Blocking  
508 Buffer at 0.05 µg/ml. Membranes were then washed for 3 x 5 min in PBS with 0.1 % Tween,  
509 rinsed with ddH<sub>2</sub>O and imaged using the Odyssey® CLX 9120 infrared imaging system  
510 (LiCor BioSciences). Image Studio Light v.5.2 was used to process scanned membranes.

511

## 512 **Tissue processing**

513 For cryosections, P0 pups were culled by cervical dislocation, and fixed in 4 %  
514 paraformaldehyde (Merck) overnight at 4 °C. Samples were cryoprotected in 30 %  
515 sucrose/PBS solutions then in 30 % sucrose/PBS:O.C.T (1:1) solutions (Tissue-Tek, Sakura  
516 Finetek Europe, Alphen aan den Rijn, The Netherlands), each overnight at 4 °C. Samples  
517 were embedded in OCT compound and transferred on dry ice. Embedded samples were  
518 sectioned at 8 µm using a Leica CM1850 cryostat (Leica, Wokingham, UK). For paraffin  
519 sections, Tissues were fixed in 10 % neutral buffered formalin (Leica,) for 24 h, then  
520 processed through graded ethanol and xylene before being embedded in paraffin wax. 5 µm  
521 sections were cut using a rotary microtome RM2235 (Leica), adhered to microscope slides,  
522 then dried overnight at 37 °C. Sections were dewaxed and rehydrated with xylene followed  
523 by a series of decreasing ethanol concentrations. Antigen retrieval was performed by  
524 microwaving sections in preheated 0.01 M citrate buffer pH 6 (Sigma Aldrich) for 5 min.

525

### 526 **Hematoxylin and Eosin Staining**

527 Sections were dewaxed and rehydrated with xylene followed by a series of decreasing  
528 ethanol concentrations. Sections were then stained in Harris hematoxylin solution (Leica) for  
529 5 min, H<sub>2</sub>O for 1 min, acid alcohol (Leica) for 5 s, H<sub>2</sub>O for 5 min, aqueous eosin (Leica) for 3  
530 min, H<sub>2</sub>O for 15 s, followed by dehydration through graded ethanol and xylene. Slides were  
531 coverslipped with DPX mounting media (Sigma Aldrich).

532

### 533 **Immunohistochemistry**

534 Slides were incubated in ice-cold acetone for 10 min, then transferred into PBS for 10  
535 min blocking, then blocked in PBS containing 10 % normal goat serum (NGS) at room  
536 temperature for 1 h. Next, samples were probed with the primary antibodies diluted in PBS-  
537 Tween (0.05 %) with 5 % NGS at 4 °C overnight. Samples were then washed for 3 x 5 min in  
538 PBS-Tween (0.05 %), before being probed with secondary antibodies diluted in PBS-Tween  
539 (0.05%) with 5 % NGS at room temperature for 1 h. Samples were washed for 3 x 5 min in  
540 PBS-Tween (0.05 %). Slides were mounted with VECTASHIELD® Antifade Mounting  
541 Medium with DAPI (VECTASHIELD®, Burlingame, CA).

542

### 543 **Image Acquisition**

544 H&E images were acquired using a Zeiss Axio Scan.Z1 equipped with an AxioCam  
545 colour CCD camera using ZEN Blue software (all from Zeiss, Oberkochen, Germany). Live  
546 cell images were acquired using a Nikon Eclipse Ti-E microscope (Nikon, Tokyo, Japan).  
547 Immunofluorescence images of tissues were acquired using a Zeiss LSM 800 confocal  
548 microscope (Zeiss).

549



550 **Image Analysis**

551 Images were processed using either Zen 2.6 (blue edition) (Zeiss) or ImageJ (National  
552 Institutes of Health, Bethesda, MD, United States)[50]. Stardist plugin [51] was used for  
553 segmentation of nuclei from H&E images. Images were thresholded manually to remove  
554 areas containing no tissue in the images.

555

556

## 557 **Acknowledgements**

558 We are grateful to the staff at the University of Liverpool Biomedical Services Unit. We  
559 would like to thank Dr. Takao Sakai, Dr. Rachel Lennon, and Dr. Mychel Morais for helpful  
560 discussions during the writing of this manuscript.

561

562 Author contributions:

563 **Conor J. Sugden:** Methodology, Validation, Formal analysis, Investigation, Data Curation,  
564 Writing - Original Draft, Writing - Review & Editing, Visualization. **Valentina Iorio:**  
565 Methodology, Investigation, Data Curation, Writing - Review & Editing. **Lee D. Troughton:**  
566 Methodology, Writing - Original Draft, Writing - Review & Editing. **Ke Liu:** Methodology,  
567 Writing - Review & Editing. **George Bou-Gharios:** Conceptualization, Methodology,  
568 Writing - Review & Editing, Supervision. **Kevin Hamill:** Conceptualization, Methodology,  
569 Writing - Original Draft , Writing - Review & Editing, Supervision, Funding acquisition.

570

571 Funding:

572 This work was supported by the biotechnology and biological sciences research council  
573 [grant number BB/L020513/1] and the The University of Liverpool Crossley Barnes Bequest  
574 fund.

575

576 **References**

577

- 578 1. Yamada, K.M., et al., *Extracellular matrix dynamics in cell migration,*  
579 *invasion and tissue morphogenesis.* Int J Exp Pathol, 2019. **100**(3): p.  
580 144-152.
- 581 2. Sekiguchi, R. and K.M. Yamada, *Basement Membranes in Development*  
582 *and Disease.* Curr Top Dev Biol, 2018. **130**: p. 143-191.
- 583 3. Yurchenco, P.D., *Basement membranes: cell scaffoldings and signaling*  
584 *platforms.* Cold Spring Harb Perspect Biol, 2011. **3**(2).
- 585 4. Pozzi, A., P.D. Yurchenco, and R.V. Iozzo, *The nature and biology of*  
586 *basement membranes.* Matrix Biol, 2017. **57-58**: p. 1-11.
- 587 5. Walma, D.A.C. and K.M. Yamada, *The extracellular matrix in*  
588 *development.* Development, 2020. **147**(10).
- 589 6. Morrissey, M.A. and D.R. Sherwood, *An active role for basement*  
590 *membrane assembly and modification in tissue sculpting.* J Cell Sci,  
591 2015. **128**(9): p. 1661-8.
- 592 7. Theocharis, A.D., et al., *Extracellular matrix structure.* Adv Drug Deliv  
593 Rev, 2016. **97**: p. 4-27.
- 594 8. Hamill, K.J., et al., *Laminin deposition in the extracellular matrix: a*  
595 *complex picture emerges.* J Cell Sci, 2009. **122**(Pt 24): p. 4409-17.
- 596 9. Hohenester, E. and P.D. Yurchenco, *Laminins in basement membrane*  
597 *assembly.* Cell Adh Migr, 2013. **7**(1): p. 56-63.
- 598 10. Aumailley, M., *The laminin family.* Cell Adh Migr, 2013. **7**(1): p. 48-55.
- 599 11. Aumailley, M., et al., *A simplified laminin nomenclature.* Matrix Biol,  
600 2005. **24**(5): p. 326-32.
- 601 12. Cheng, Y.S., et al., *Self-assembly of laminin isoforms.* J Biol Chem, 1997.  
602 **272**(50): p. 31525-32.
- 603 13. Odenthal, U., et al., *Molecular analysis of laminin N-terminal domains*  
604 *mediating self-interactions.* J Biol Chem, 2004. **279**(43): p. 44504-12.
- 605 14. Schittny, J.C. and P.D. Yurchenco, *Terminal short arm domains of*  
606 *basement membrane laminin are critical for its self-assembly.* J Cell Biol,  
607 1990. **110**(3): p. 825-32.
- 608 15. Yurchenco, P.D. and Y.S. Cheng, *Laminin self-assembly: a three-arm*  
609 *interaction hypothesis for the formation of a network in basement*  
610 *membranes.* Contrib Nephrol, 1994. **107**: p. 47-56.
- 611 16. Purvis, A. and E. Hohenester, *Laminin network formation studied by*  
612 *reconstitution of ternary nodes in solution.* J Biol Chem, 2012. **287**(53):  
613 p. 44270-7.
- 614 17. Carafoli, F., S.A. Hussain, and E. Hohenester, *Crystal structures of the*  
615 *network-forming short-arm tips of the laminin beta1 and gamma1 chains.*  
616 PLoS One, 2012. **7**(7): p. e42473.

- 617 18. McKee, K.K., M. Aleksandrova, and P.D. Yurchenco, *Chimeric protein*  
618 *identification of dystrophic, Pierson and other laminin polymerization*  
619 *residues*. Matrix Biol, 2018. **67**: p. 32-46.
- 620 19. Matejas, V., et al., *Mutations in the human laminin beta2 (LAMB2) gene*  
621 *and the associated phenotypic spectrum*. Hum Mutat, 2010. **31**(9): p.  
622 992-1002.
- 623 20. Funk, S.D., M.H. Lin, and J.H. Miner, *Alport syndrome and Pierson*  
624 *syndrome: Diseases of the glomerular basement membrane*. Matrix Biol,  
625 2018. **71-72**: p. 250-261.
- 626 21. Gawlik, K.I. and M. Durbeej, *Skeletal muscle laminin and MDC1A:*  
627 *pathogenesis and treatment strategies*. Skelet Muscle, 2011. **1**(1): p. 9.
- 628 22. Funk, S.D., et al., *Pathogenicity of a Human Laminin beta2 Mutation*  
629 *Revealed in Models of Alport Syndrome*. J Am Soc Nephrol, 2018. **29**(3):  
630 p. 949-960.
- 631 23. Hohenester, E., *Structural biology of laminins*. Essays Biochem, 2019.  
632 **63**(3): p. 285-295.
- 633 24. Yousif, L.F., J. Di Russo, and L. Sorokin, *Laminin isoforms in*  
634 *endothelial and perivascular basement membranes*. Cell Adh Migr, 2013.  
635 **7**(1): p. 101-10.
- 636 25. Hamill, K.J., et al., *Identification of a novel family of laminin N-terminal*  
637 *alternate splice isoforms: structural and functional characterization*. J  
638 Biol Chem, 2009. **284**(51): p. 35588-96.
- 639 26. Rajasekharan, S. and T.E. Kennedy, *The netrin protein family*. Genome  
640 Biol, 2009. **10**(9): p. 239.
- 641 27. Ettner, N., et al., *The N-terminal globular domain of the laminin alpha1*  
642 *chain binds to alpha1beta1 and alpha2beta1 integrins and to the heparan*  
643 *sulfate-containing domains of perlecan*. FEBS Lett, 1998. **430**(3): p. 217-  
644 21.
- 645 28. Horejs, C.M., et al., *Biologically-active laminin-111 fragment that*  
646 *modulates the epithelial-to-mesenchymal transition in embryonic stem*  
647 *cells*. Proc Natl Acad Sci U S A, 2014. **111**(16): p. 5908-13.
- 648 29. Kariya, Y., et al., *Characterization of laminin 5B and NH2-terminal*  
649 *proteolytic fragment of its alpha3B chain: promotion of cellular*  
650 *adhesion, migration, and proliferation*. J Biol Chem, 2004. **279**(23): p.  
651 24774-84.
- 652 30. Lai Wing Sun, K., J.P. Correia, and T.E. Kennedy, *Netrins: versatile*  
653 *extracellular cues with diverse functions*. Development, 2011. **138**(11): p.  
654 2153-69.
- 655 31. Fahey, B. and B.M. Degnan, *Origin and evolution of laminin gene family*  
656 *diversity*. Mol Biol Evol, 2012. **29**(7): p. 1823-36.
- 657 32. Leclere, L. and F. Rentsch, *Repeated evolution of identical domain*  
658 *architecture in metazoan netrin domain-containing proteins*. Genome  
659 Biol Evol, 2012. **4**(9): p. 883-99.

- 660 33. Reuten, R., et al., *Structural decoding of netrin-4 reveals a regulatory*  
661 *function towards mature basement membranes*. Nat Commun, 2016. **7**: p.  
662 13515.
- 663 34. Schneiders, F.I., et al., *Binding of netrin-4 to laminin short arms*  
664 *regulates basement membrane assembly*. J Biol Chem, 2007. **282**(33): p.  
665 23750-8.
- 666 35. Larrieu-Lahargue, F., et al., *Netrin-4 induces lymphangiogenesis in vivo*.  
667 Blood, 2010. **115**(26): p. 5418-26.
- 668 36. Koch, M., et al., *A novel member of the netrin family, beta-netrin, shares*  
669 *homology with the beta chain of laminin: identification, expression, and*  
670 *functional characterization*. J Cell Biol, 2000. **151**(2): p. 221-34.
- 671 37. Barrera, V., et al., *Differential Distribution of Laminin N-Terminus*  
672 *alpha31 Across the Ocular Surface: Implications for Corneal Wound*  
673 *Repair*. Invest Ophthalmol Vis Sci, 2018. **59**(10): p. 4082-4093.
- 674 38. Troughton, L.D., et al., *Laminin N-terminus alpha31 protein distribution in*  
675 *adult human tissues*. bioRxiv, 2020: p. 2020.05.21.108134.
- 676 39. Troughton, L.D., T. Zech, and K.J. Hamill, *Laminin N-terminus alpha31 is*  
677 *upregulated in invasive ductal breast cancer and changes the mode of*  
678 *tumour invasion*. bioRxiv, 2020: p. 2020.05.28.120964.
- 679 40. Iorio, V., et al., *LaNt alpha31 modulates LM332 organisation during matrix*  
680 *deposition leading to cell-matrix adhesion and migration defects*.  
681 bioRxiv, 2019: p. 617597.
- 682 41. Pribnow, D., *Nucleotide sequence of an RNA polymerase binding site at*  
683 *an early T7 promoter*. Proc Natl Acad Sci U S A, 1975. **72**(3): p. 784-8.
- 684 42. Kozak, M., *An analysis of 5'-noncoding sequences from 699 vertebrate*  
685 *messenger RNAs*. Nucleic Acids Res, 1987. **15**(20): p. 8125-48.
- 686 43. Coloma, M.J., et al., *Novel vectors for the expression of antibody*  
687 *molecules using variable regions generated by polymerase chain*  
688 *reaction*. J Immunol Methods, 1992. **152**(1): p. 89-104.
- 689 44. Brizzard, B.L., R.G. Chubet, and D.L. Vizard, *Immunoaffinity*  
690 *purification of FLAG epitope-tagged bacterial alkaline phosphatase*  
691 *using a novel monoclonal antibody and peptide elution*. Biotechniques,  
692 1994. **16**(4): p. 730-5.
- 693 45. Field, J., et al., *Purification of a RAS-responsive adenylyl cyclase*  
694 *complex from Saccharomyces cerevisiae by use of an epitope addition*  
695 *method*. Mol Cell Biol, 1988. **8**(5): p. 2159-65.
- 696 46. Kim, J.H., et al., *High cleavage efficiency of a 2A peptide derived from*  
697 *porcine teschovirus-1 in human cell lines, zebrafish and mice*. PLoS One,  
698 2011. **6**(4): p. e18556.
- 699 47. Yuspa, S.H. and C.C. Harris, *Altered differentiation of mouse epidermal*  
700 *cells treated with retinyl acetate in vitro*. Exp Cell Res, 1974. **86**(1): p.  
701 95-105.

- 702 48. Ittner, L.M. and J. Gotz, *Pronuclear injection for the production of*  
703 *transgenic mice*. Nat Protoc, 2007. **2**(5): p. 1206-15.
- 704 49. Ventura, A., et al., *Restoration of p53 function leads to tumour regression*  
705 *in vivo*. Nature, 2007. **445**(7128): p. 661-5.
- 706 50. Schneider, C.A., W.S. Rasband, and K.W. Eliceiri, *NIH Image to*  
707 *ImageJ: 25 years of image analysis*. Nat Methods, 2012. **9**(7): p. 671-5.
- 708 51. Schmidt, U., et al. *Cell Detection with Star-Convex Polygons*. 2018.  
709 Cham: Springer International Publishing.
- 710 52. Ochiai, H., H. Harashima, and H. Kamiya, *Effects of insulator cHS4 on*  
711 *transgene expression from plasmid DNA in a positive feedback system*. J  
712 Biosci Bioeng, 2011. **112**(5): p. 432-4.
- 713 53. Zenker, M., et al., *Human laminin beta2 deficiency causes congenital*  
714 *nephrosis with mesangial sclerosis and distinct eye abnormalities*. Hum  
715 Mol Genet, 2004. **13**(21): p. 2625-32.
- 716 54. Zenker, M., et al., *Demonstration of two novel LAMB2 mutations in the*  
717 *original Pierson syndrome family reported 42 years ago*. Am J Med  
718 Genet A, 2005. **138**(1): p. 73-4.
- 719 55. Hinkes, B.G., et al., *Nephrotic syndrome in the first year of life: two*  
720 *thirds of cases are caused by mutations in 4 genes (NPHS1, NPHS2,*  
721 *WT1, and LAMB2)*. Pediatrics, 2007. **119**(4): p. e907-19.
- 722 56. Chen, Y.M., Y. Kikkawa, and J.H. Miner, *A missense LAMB2 mutation*  
723 *causes congenital nephrotic syndrome by impairing laminin secretion*. J  
724 Am Soc Nephrol, 2011. **22**(5): p. 849-58.
- 725 57. Kiritsi, D., C. Has, and L. Bruckner-Tuderman, *Laminin 332 in junctional*  
726 *epidermolysis bullosa*. Cell Adh Migr, 2013. **7**(1): p. 135-41.
- 727 58. McLean, W.H., et al., *An unusual N-terminal deletion of the laminin*  
728 *alpha3a isoform leads to the chronic granulation tissue disorder laryngo-*  
729 *onycho-cutaneous syndrome*. Hum Mol Genet, 2003. **12**(18): p. 2395-  
730 409.
- 731 59. Barzegar, M., et al., *A new homozygous nonsense mutation in LAMA3A*  
732 *underlying laryngo-onycho-cutaneous syndrome*. Br J Dermatol, 2013.  
733 **169**(6): p. 1353-6.
- 734 60. Pierce, R.A., et al., *Expression of laminin alpha3, alpha4, and alpha5*  
735 *chains by alveolar epithelial cells and fibroblasts*. Am J Respir Cell Mol  
736 Biol, 1998. **19**(2): p. 237-44.
- 737 61. DeBiase, P.J., et al., *Laminin-311 (Laminin-6) fiber assembly by type I-*  
738 *like alveolar cells*. J Histochem Cytochem, 2006. **54**(6): p. 665-72.
- 739 62. Morales-Nebreda, L.I., et al., *Lung-specific loss of alpha3 laminin*  
740 *worsens bleomycin-induced pulmonary fibrosis*. Am J Respir Cell Mol  
741 Biol, 2015. **52**(4): p. 503-12.
- 742 63. Coulombe, P.A., R. Kopan, and E. Fuchs, *Expression of keratin K14 in*  
743 *the epidermis and hair follicle: insights into complex programs of*  
744 *differentiation*. J Cell Biol, 1989. **109**(5): p. 2295-312.



- 745 64. Vasioukhin, V., et al., *The magical touch: genome targeting in epidermal*  
746 *stem cells induced by tamoxifen application to mouse skin*. Proc Natl  
747 Acad Sci U S A, 1999. **96**(15): p. 8551-6.
- 748 65. Wang, X., et al., *Transgenic studies with a keratin promoter-driven*  
749 *growth hormone transgene: prospects for gene therapy*. Proc Natl Acad  
750 Sci U S A, 1997. **94**(1): p. 219-26.
- 751 66. Hafner, M., et al., *Keratin 14 Cre transgenic mice authenticate keratin 14*  
752 *as an oocyte-expressed protein*. Genesis, 2004. **38**(4): p. 176-81.
- 753 67. Hussain, S.A., F. Carafoli, and E. Hohenester, *Determinants of laminin*  
754 *polymerization revealed by the structure of the alpha5 chain amino-*  
755 *terminal region*. EMBO Rep, 2011. **12**(3): p. 276-82.
- 756 68. Jones, L.K., et al., *A mutation affecting laminin alpha 5 polymerisation*  
757 *gives rise to a syndromic developmental disorder*. Development, 2020.
- 758 69. Noakes, P.G., et al., *Aberrant differentiation of neuromuscular junctions*  
759 *in mice lacking s-laminin/laminin beta 2*. Nature, 1995. **374**(6519): p.  
760 258-62.
- 761 70. Noakes, P.G., et al., *The renal glomerulus of mice lacking s-*  
762 *laminin/laminin beta 2: nephrosis despite molecular compensation by*  
763 *laminin beta 1*. Nat Genet, 1995. **10**(4): p. 400-6.
- 764 71. Miner, J.H., et al., *Transgenic isolation of skeletal muscle and kidney*  
765 *defects in laminin beta2 mutant mice: implications for Pierson syndrome*.  
766 Development, 2006. **133**(5): p. 967-75.
- 767 72. Jarad, G., et al., *Proteinuria precedes podocyte abnormalities in Lamb2-/-*  
768 *mice, implicating the glomerular basement membrane as an albumin*  
769 *barrier*. J Clin Invest, 2006. **116**(8): p. 2272-9.
- 770 73. Libby, R.T., et al., *Disruption of laminin beta2 chain production causes*  
771 *alterations in morphology and function in the CNS*. J Neurosci, 1999.  
772 **19**(21): p. 9399-411.
- 773 74. Denes, V., et al., *Laminin deficits induce alterations in the development*  
774 *of dopaminergic neurons in the mouse retina*. Vis Neurosci, 2007. **24**(4):  
775 p. 549-62.
- 776 75. Hallmann, R., et al., *Expression and function of laminins in the*  
777 *embryonic and mature vasculature*. Physiol Rev, 2005. **85**(3): p. 979-  
778 1000.
- 779 76. Petajaniemi, N., et al., *Localization of laminin alpha4-chain in*  
780 *developing and adult human tissues*. J Histochem Cytochem, 2002. **50**(8):  
781 p. 1113-30.
- 782 77. Vainionpaa, N., et al., *Basement membrane protein distribution in LYVE-*  
783 *1-immunoreactive lymphatic vessels of normal tissues and ovarian*  
784 *carcinomas*. Cell Tissue Res, 2007. **328**(2): p. 317-28.
- 785 78. Moore, M.A. and D. Metcalf, *Ontogeny of the haemopoietic system: yolk*  
786 *sac origin of in vivo and in vitro colony forming cells in the developing*  
787 *mouse embryo*. Br J Haematol, 1970. **18**(3): p. 279-96.

- 788 79. Sanchez, M.J., et al., *Characterization of the first definitive hematopoietic*  
789 *stem cells in the AGM and liver of the mouse embryo*. *Immunity*, 1996.  
790 **5**(6): p. 513-25.
- 791 80. Dzierzak, E. and N.A. Speck, *Of lineage and legacy: the development of*  
792 *mammalian hematopoietic stem cells*. *Nat Immunol*, 2008. **9**(2): p. 129-  
793 36.
- 794 81. Qian, H., et al., *Contribution of alpha6 integrins to hematopoietic stem*  
795 *and progenitor cell homing to bone marrow and collaboration with*  
796 *alpha4 integrins*. *Blood*, 2006. **107**(9): p. 3503-10.
- 797 82. Potocnik, A.J., C. Brakebusch, and R. Fassler, *Fetal and adult*  
798 *hematopoietic stem cells require beta1 integrin function for colonizing*  
799 *fetal liver, spleen, and bone marrow*. *Immunity*, 2000. **12**(6): p. 653-63.
- 800 83. Hirsch, E., et al., *Impaired migration but not differentiation of*  
801 *haematopoietic stem cells in the absence of beta1 integrins*. *Nature*, 1996.  
802 **380**(6570): p. 171-5.
- 803 84. Staquicini, F.I., et al., *Discovery of a functional protein complex of*  
804 *netrin-4, laminin gamma1 chain, and integrin alpha6beta1 in mouse*  
805 *neural stem cells*. *Proc Natl Acad Sci U S A*, 2009. **106**(8): p. 2903-8.
- 806 85. Sher, I., et al., *Targeting perlecan in human keratinocytes reveals novel*  
807 *roles for perlecan in epidermal formation*. *J Biol Chem*, 2006. **281**(8): p.  
808 5178-87.
- 809 86. Penton, C.M., et al., *Laminin 521 maintains differentiation potential of*  
810 *mouse and human satellite cell-derived myoblasts during long-term*  
811 *culture expansion*. *Skelet Muscle*, 2016. **6**(1): p. 44.
- 812 87. Kiyozumi, D., et al., *Laminin is the ECM niche for trophoblast stem cells*.  
813 *Life Sci Alliance*, 2020. **3**(2).
- 814 88. Rodin, S., et al., *Long-term self-renewal of human pluripotent stem cells*  
815 *on human recombinant laminin-511*. *Nat Biotechnol*, 2010. **28**(6): p. 611-  
816 5.
- 817 89. Polisetti, N., et al., *Laminin-511 and -521-based matrices for efficient ex*  
818 *vivo-expansion of human limbal epithelial progenitor cells*. *Sci Rep*,  
819 2017. **7**(1): p. 5152.
- 820 90. Sunada, Y., et al., *Identification of a novel mutant transcript of laminin*  
821 *alpha 2 chain gene responsible for muscular dystrophy and*  
822 *dysmyelination in dy2J mice*. *Hum Mol Genet*, 1995. **4**(6): p. 1055-61.
- 823 91. Xu, H., et al., *Murine muscular dystrophy caused by a mutation in the*  
824 *laminin alpha 2 (Lama2) gene*. *Nat Genet*, 1994. **8**(3): p. 297-302.
- 825 92. Payne, S., S. De Val, and A. Neal, *Endothelial-Specific Cre Mouse*  
826 *Models*. *Arterioscler Thromb Vasc Biol*, 2018. **38**(11): p. 2550-2561.
- 827 93. Poulos, M.G., et al., *Developments in RNA splicing and disease*. *Cold*  
828 *Spring Harb Perspect Biol*, 2011. **3**(1): p. a000778.



- 829 94. Baralle, F.E. and J. Giudice, *Alternative splicing as a regulator of*  
830 *development and tissue identity*. Nat Rev Mol Cell Biol, 2017. **18**(7): p.  
831 437-451.
- 832 95. Ffrench-Constant, C., et al., *Reappearance of an embryonic pattern of*  
833 *fibronectin splicing during wound healing in the adult rat*. J Cell Biol,  
834 1989. **109**(2): p. 903-14.  
835

836 **Figure legends**

837

838 **Figure 1 - Validation of UbCLa $\alpha$ 31-T2A-tdTomato Cre-inducible construct in vitro**

839 A) Diagram of the pUbC-LoxP-La $\alpha$ 31-T2A-tdTomato construct. B) HEK 293A cells  
840 were transfected with pUbC-LoxP-La $\alpha$ 31-T2A-tdTomato, pCAG-Cre:GFP, or pUbC-  
841 LoxP-La $\alpha$ 31-T2A-tdTomato and pCAG-Cre:GFP and imaged 48 h after transfection.  
842 Scale bar 100  $\mu$ m C) PCR was performed using primers flanking the stop cassette on DNA  
843 extracted from HEK293A cells co-transfected with pUbC-LoxP-La $\alpha$ 31-T2A-tdTomato  
844 and pCAG-Cre:GFP. D) Western blot of lysates from HEK293 cells either untransfected or  
845 transfected with CMV- La $\alpha$ 31-T2A-Dendra2 (positive control), or pUbC-LoxP-La $\alpha$ -  
846  $\alpha$ 31-T2A-tdTomato and pCAG-Cre:GFP then probed with anti-flag antibodies

847

848 **Figure 2 -UbC-LoxP-La $\alpha$ 31-T2A-tdTomato embryonic fibroblast express the**  
849 **transgene upon transduction with a Cre recombinase-coding adenovirus**

850 A) PCR was performed on gDNA of F1 UbC-LoxP-La $\alpha$ 31-T2A-tdTomato embryos. B)  
851 Western blot of protein lysates from explanted F1 mouse embryonic fibroblasts processed  
852 with anti-HA antibodies. C) Fluorescence microscopy images of explanted cells from UbC-  
853 LoxP-La $\alpha$ 31-T2A-tdTomato F1 mice. Scale bar = 100  $\mu$ m.

854

855 **Figure 3 - UbCLa $\alpha$ 31 x R26CreERT2 ER transgenic mice express the UbC-La $\alpha$ 31**  
856 **transgene following exposure to tamoxifen**

857 A) Schematic diagram of the UbC-La $\alpha$ 31 and Rosa-Cre transgenes. B) PCR performed  
858 using primers flanking the stop cassette on DNA extracted from transgenic mouse embryos  
859 from a UbCLa $\alpha$ 31 x R26CreERT2 mating. C) Phase contrast and fluorescence microscopy  
860 images of explanted cells from UbCLa $\alpha$ 31::R26CreERT2 embryos. Scale bar = 100  $\mu$ m.

861 D) Western blot of lysates from UbCLa $\alpha$ 31::R26CreERT2 embryo explants processed with  
862 anti-HA antibodies.

863

864 **Figure 4 - Transgenic mice overexpressing LaNt $\alpha$ 31 display localised regions of**  
865 **erythema**

866 A) Representative images of UbCLa $\alpha$ 31::R26CreERT2 P0 mice B) PCR genotyping of

867 transgenic mice. C) Fluorescence microscopy images of explanted cells from

868 UbCLa $\alpha$ 31::R26CreERT2 P0 mice. D) Western blot of tissue lysates of

869 UbCLa $\alpha$ 31::R26CreERT2 P0 mice. E) Representative fluorescence microscopy

870 UbCLa $\alpha$ 31::R26CreERT2 P0 mouse OCT sections (8  $\mu$ m) probed with anti-mCherry

871 antibodies. Yellow arrows indicate cells expressing the tdTomato transgene reporter. Scale

872 bar = 100  $\mu$ m.

873

874 **Figure 5 - LaNt  $\alpha$ 31 overexpression leads to epithelial detachment, tubular dilation and**  
875 **interstitial bleeding in the kidney.**

876 Representative images of H&E stained FFPE sections (5  $\mu$ m) of newborn

877 UbCLa $\alpha$ 31::R26CreERT2 transgenic mouse kidneys. Middle and right columns show areas of

878 increased magnification. Black arrows point to areas of epithelial detachment. White arrows

879 point to tubular dilation. Yellow arrows point to areas of interstitial bleeding. Scale bar = 100

880  $\mu$ m.

881

882 **Figure 6 - LaNt  $\alpha$ 31 overexpression causes a thickening of the tubular basement**  
883 **membrane.**

884 UbCLaNt::R26CreERT2 P0 mouse FFPE sections (5  $\mu$ m) processed for  
885 immunohistochemistry with anti-laminin 111 polyclonal antibodies. Middle and right  
886 columns show areas of increased magnification. Scale bars = 100  $\mu$ m.

887

888 **Figure 7 - LaNt  $\alpha$ 31 overexpression disrupts epidermal-dermal basement membrane.**

889 A) H&E staining of FFPE sections (5  $\mu$ m) of newborn UbCLaNt::R26CreERT2 transgenic  
890 mouse dorsal skin. Middle and right columns show increased magnification of the  
891 epithelium or hair follicles respectively. Yellow arrows indicate basal layer of epithelial  
892 cells. Scale bar = 100  $\mu$ m. B) UbCLaNt::R26CreERT2 P0 mouse FFPE sections (5  $\mu$ m)  
893 processed for immunohistochemistry with anti-laminin 111 immunoreactivity. Middle and  
894 right columns show areas of increased magnification. Yellow arrows indicate the epidermal-  
895 dermal junction. Scale bar = 100  $\mu$ m.

896

897 **Figure 8 - Mice expressing the LaNt $\alpha$ 31 transgene display structural differences in the**  
898 **lung.**

899 UbCLaNt $\alpha$ 31::R26CreERT2 P0 lung FFPE sections (5  $\mu$ m) stained with H&E. Middle and  
900 right columns show areas of increased magnification. Scale bar = 100  $\mu$ m.

901

902 **Figure 9 - LaNt  $\alpha$ 31 overexpression leads to a reduction of hematopoietic colonies in the**  
903 **liver**

904 A) H&E staining of FFPE sections (5  $\mu$ m) of newborn UbCLaNt::R26CreERT2 transgenic  
905 mouse skin. Middle and right columns show increased magnification of different area of  
906 the liver. Yellow arrowheads highlight areas of increased cell density. Scale bar =

907 100  $\mu$ m. B) Representative image analysis method of determining nuclei count. C)

908 Quantification of nuclei.

909

910

911 **Supplemental figure 1 – Transgenic expression of LaNt  $\alpha$ 31 under control of the human**

912 **keratin-14 promoter results in a low number of offspring.**

913 A) Diagram of the phK14-LaNt $\alpha$ 31-T2A-mCherry construct. B) Fluorescence microscopy

914 images of KERA 308 cells transfected with phK14-LaNt $\alpha$ 31-T2A-mCherry. C) Western blot

915 of protein lysates from transfected KERA 308 cells. D) Schematic of F0 mice generation and

916 PCR genotyping of F0 mice. E) PCR genotyping of F1 mice. F) Representative fluorescence

917 images of frozen sections from F1 mice tissues. G) Western blot of tissue lysates from F1

918 mice, probed with anti-His antibodies.

919

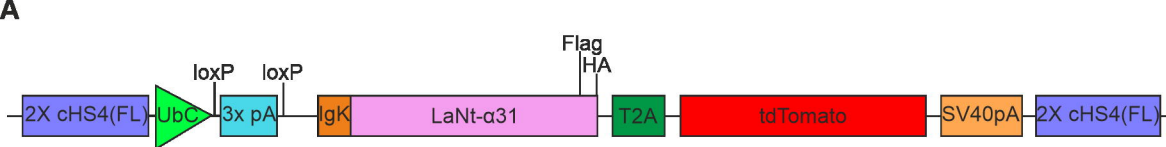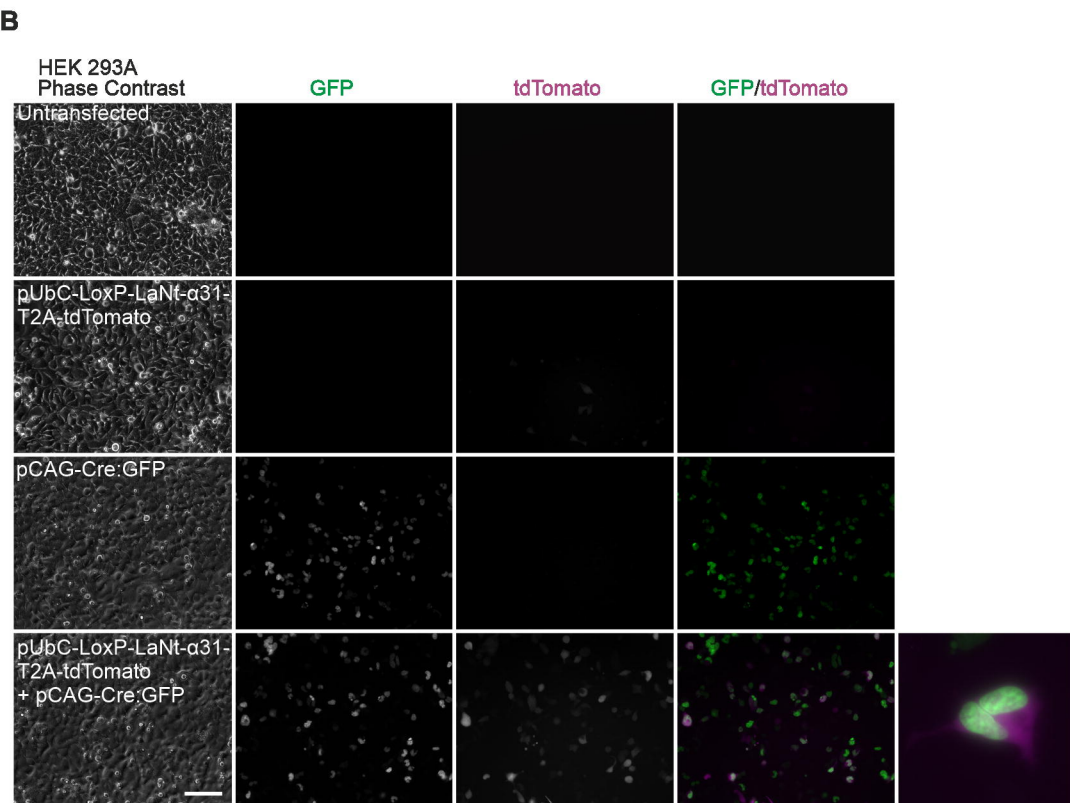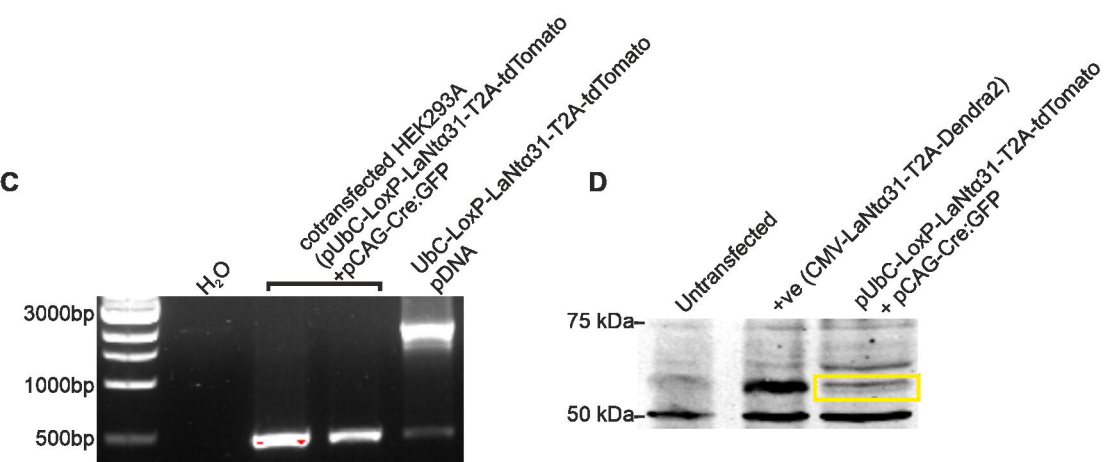

**A**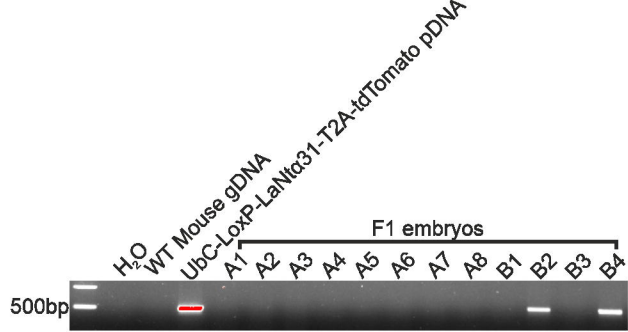**B**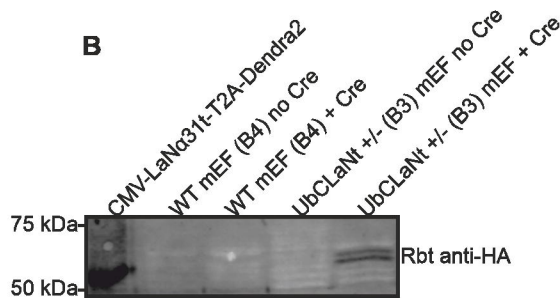**C**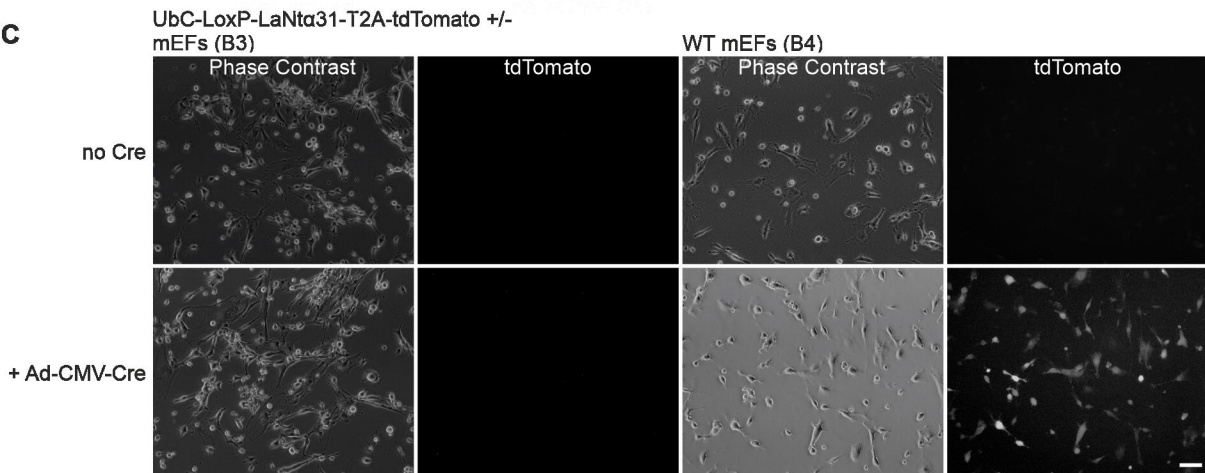

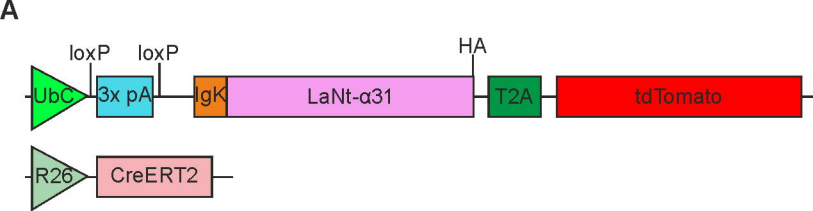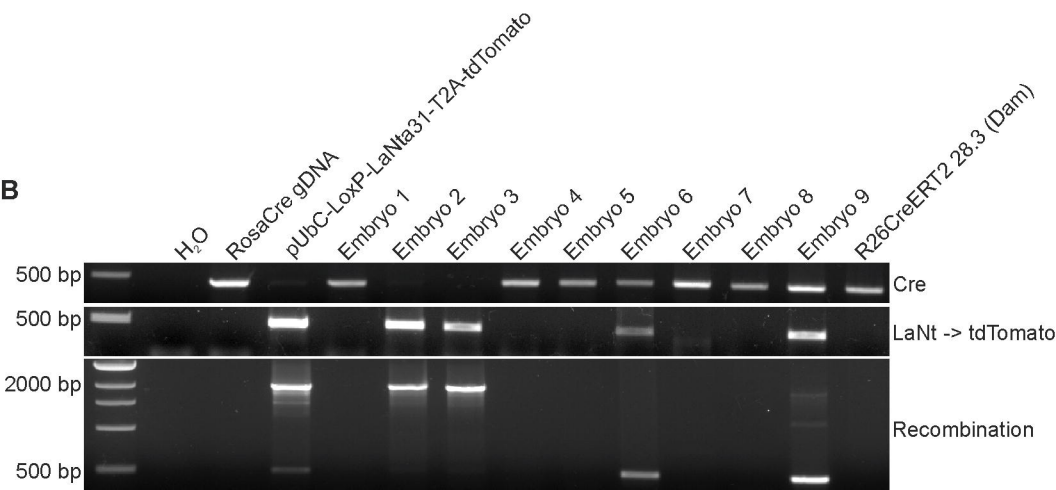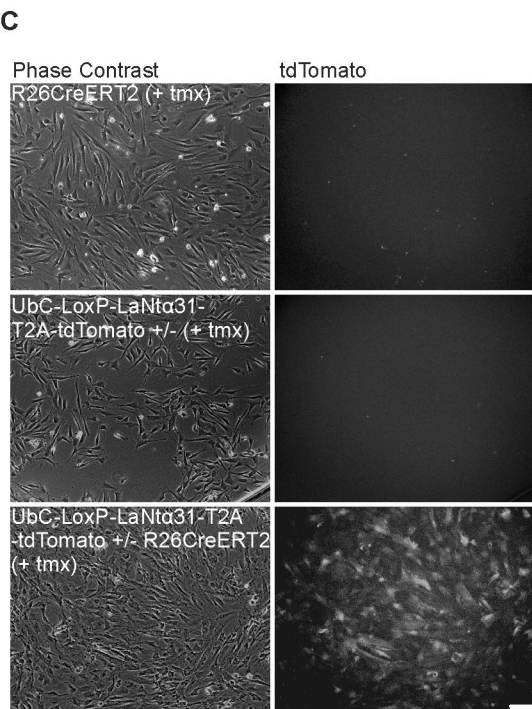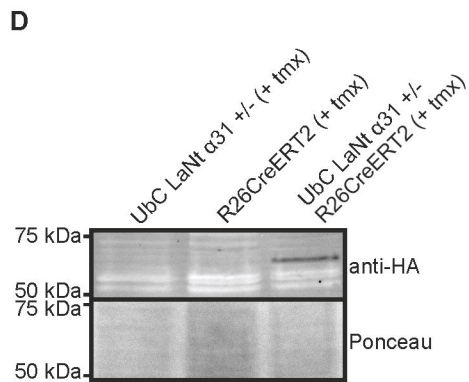



**A**  
 UbCLa<sup>Nt</sup>::R26CreERT2 2NE2 non-expressing  
 UbCLa<sup>Nt</sup>::R26CreERT2 2E1 expressing

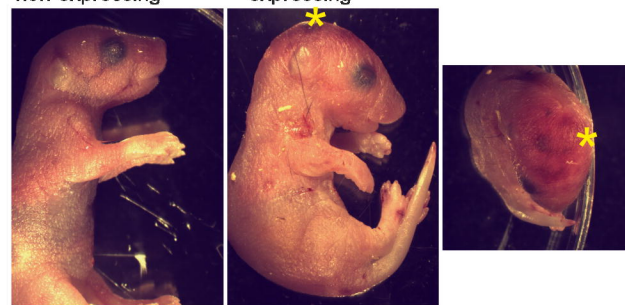

**B**

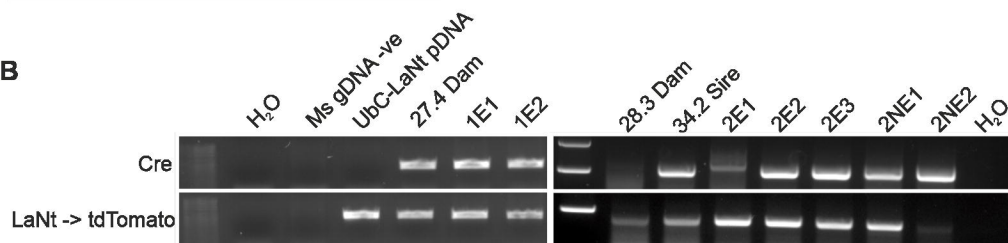

**C**

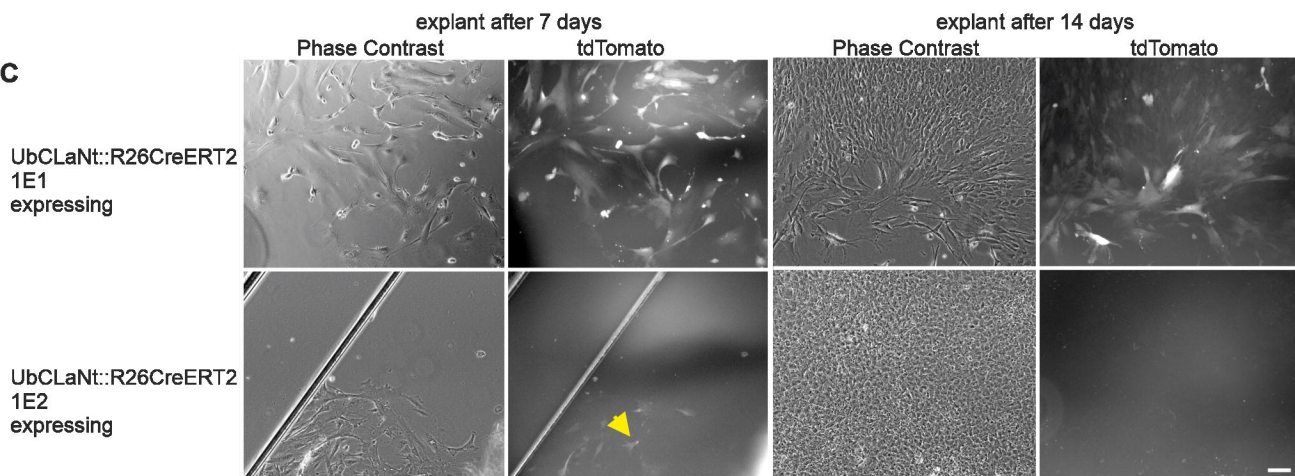

**D**

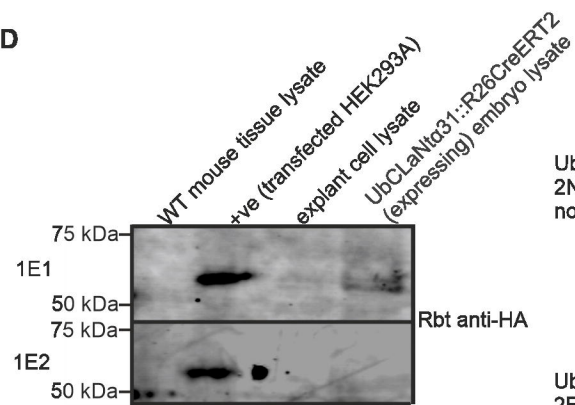

**E**

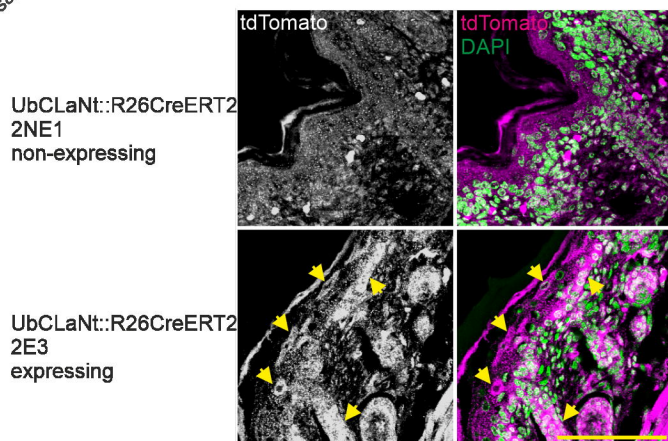

UbCLa<sup>Nt</sup>::R26CreERT2  
2NE1  
non-expressing

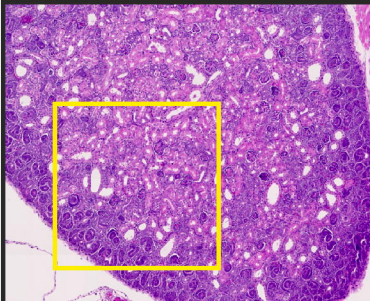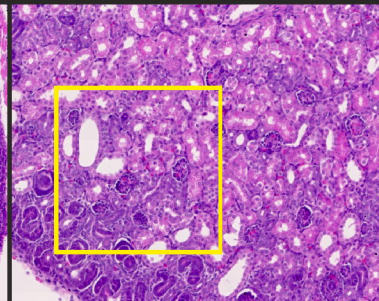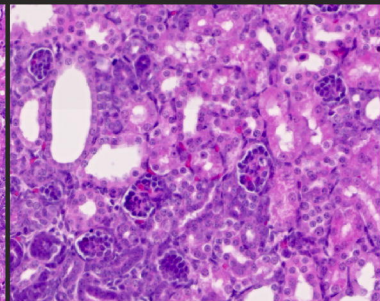

UbCLa<sup>Nt</sup>::R26CreERT2  
2E1  
expressing

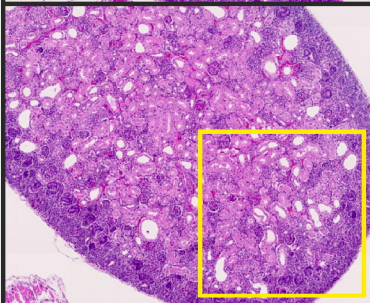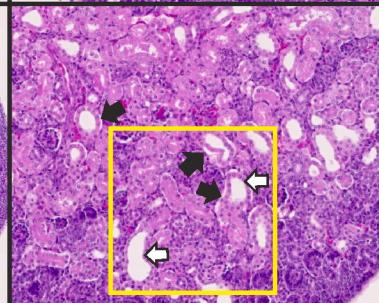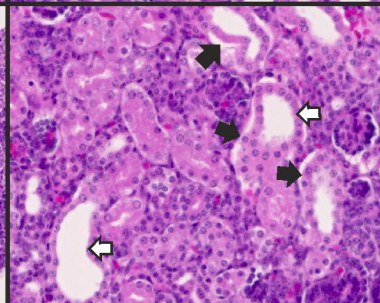

UbCLa<sup>Nt</sup>::R26CreERT2  
2E3  
expressing

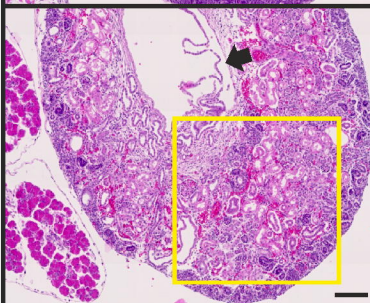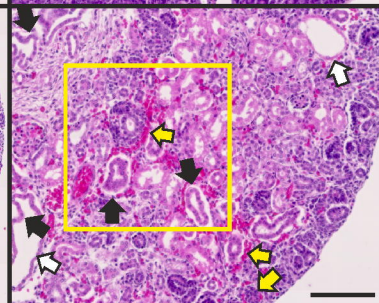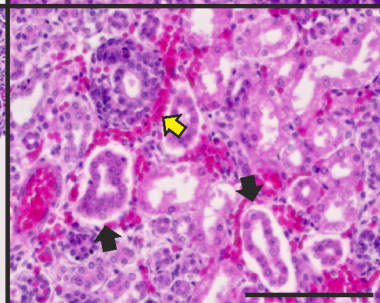



anti-LM 111

UbCLa<sup>Nt</sup>::R26CreERT2  
2NE1  
non-expressing

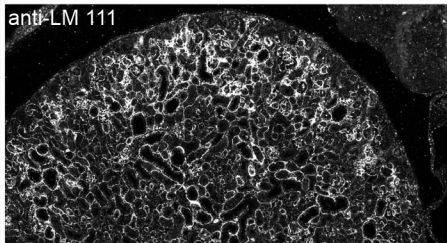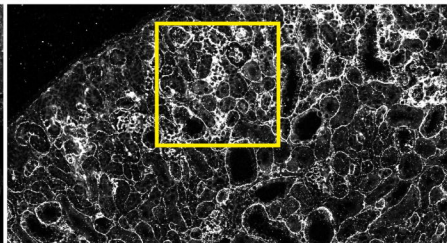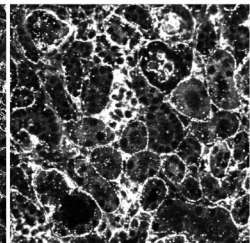

UbCLa<sup>Nt</sup>::R26CreERT2  
2E1  
expressing

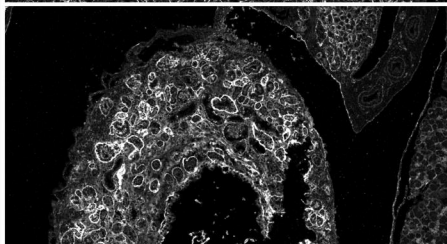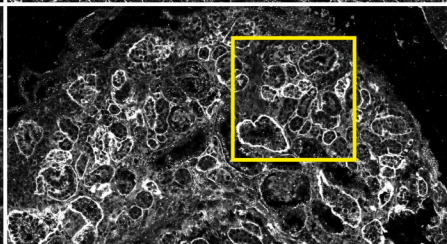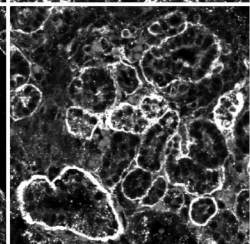

UbCLa<sup>Nt</sup>::R26CreERT2  
2E3  
expressing

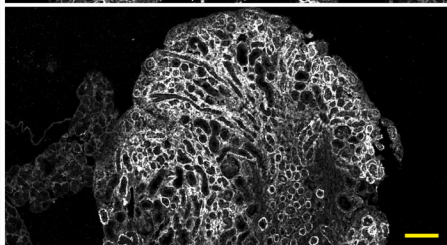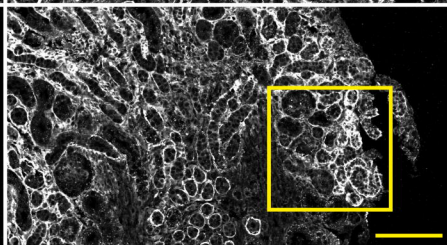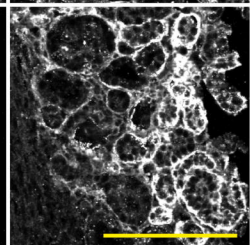



**A**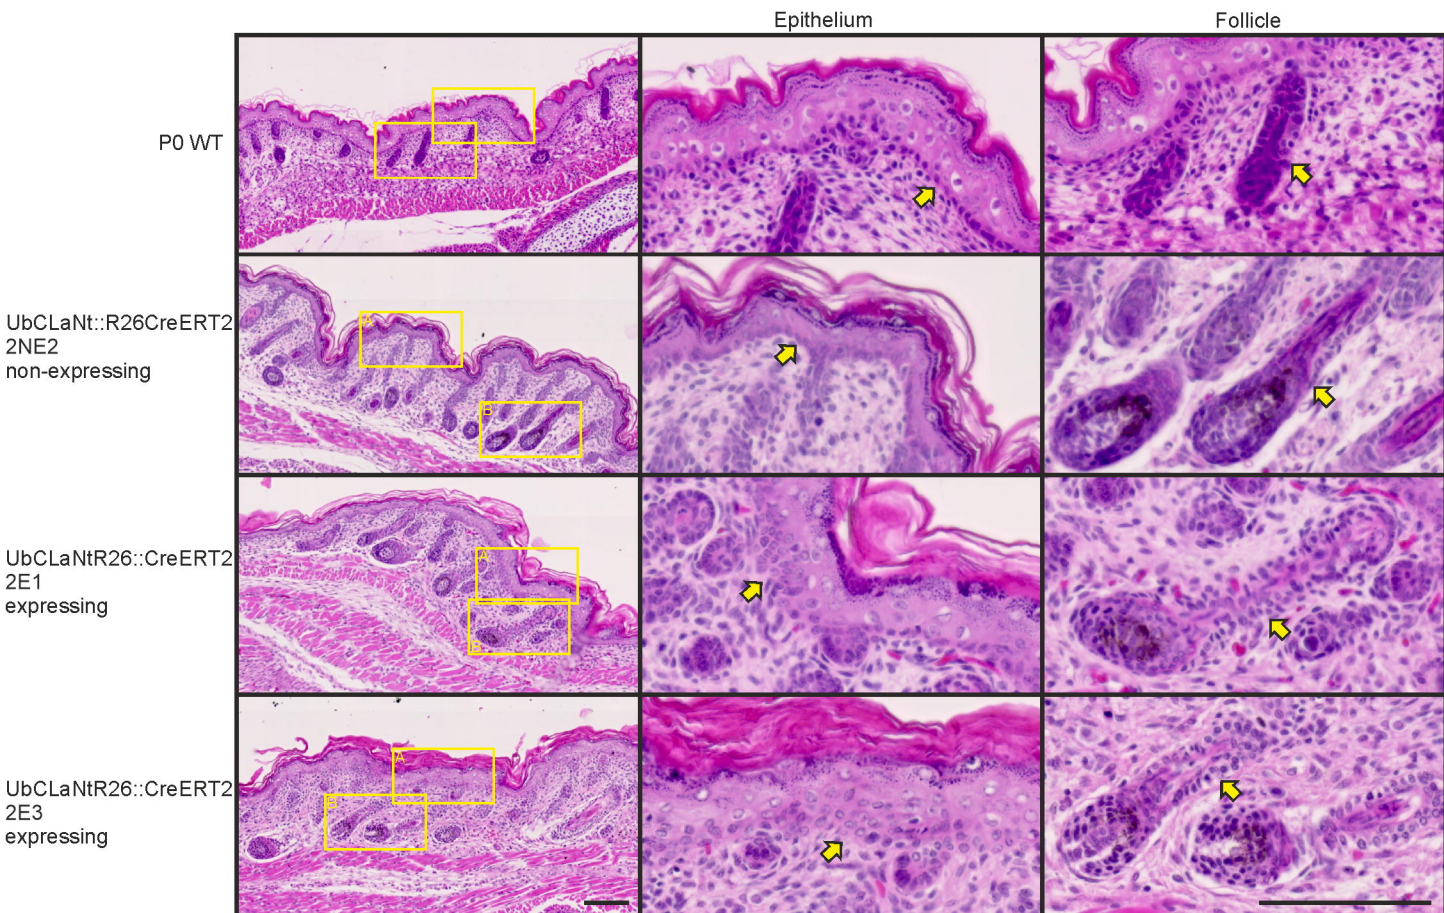**B**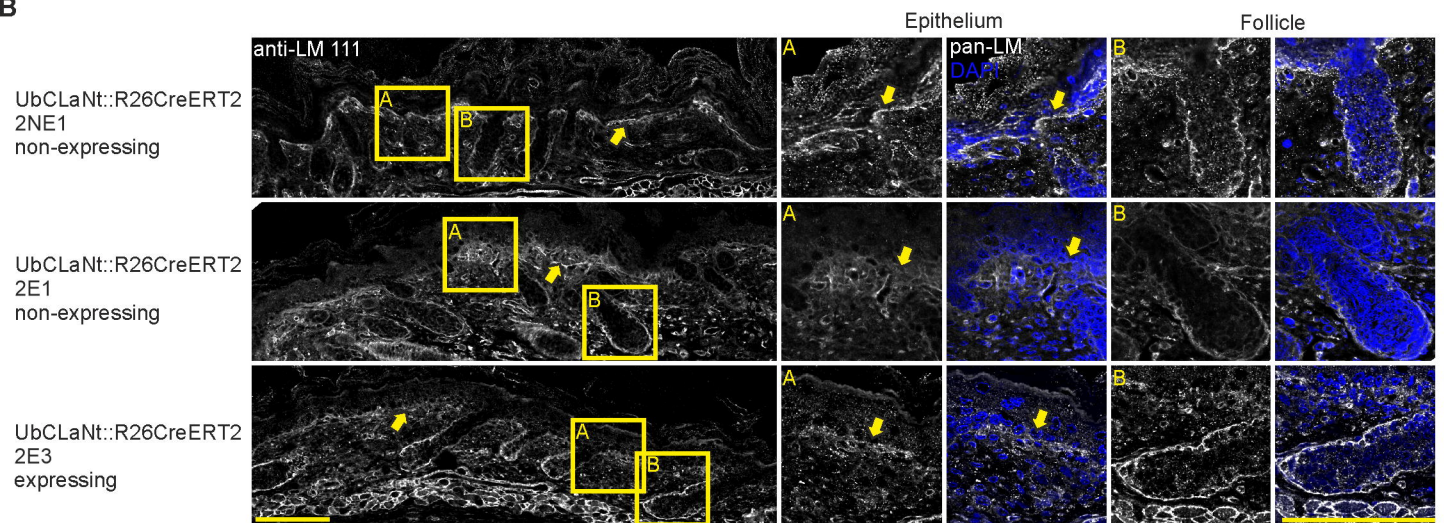



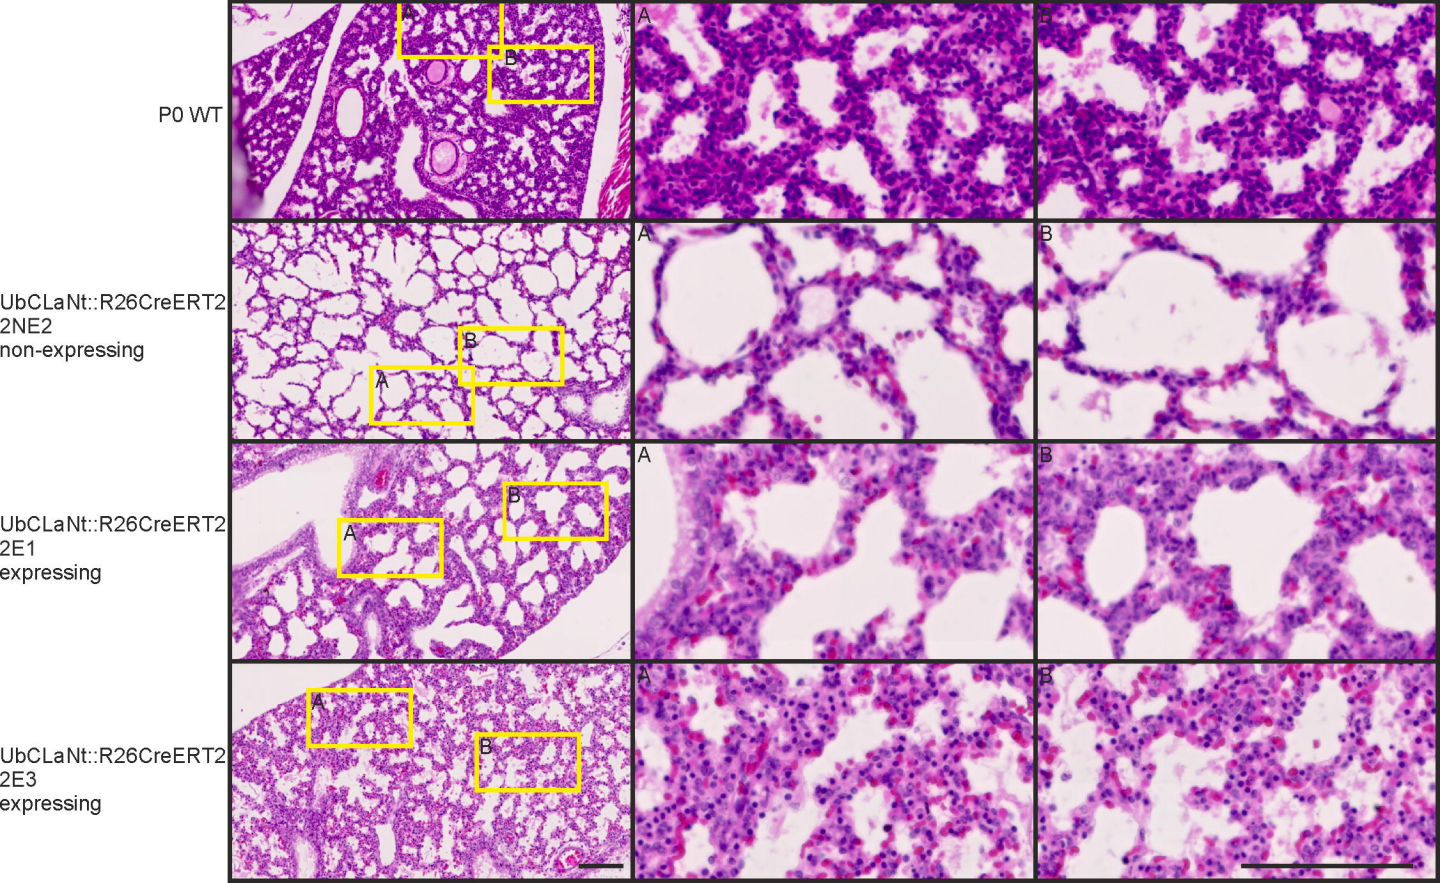



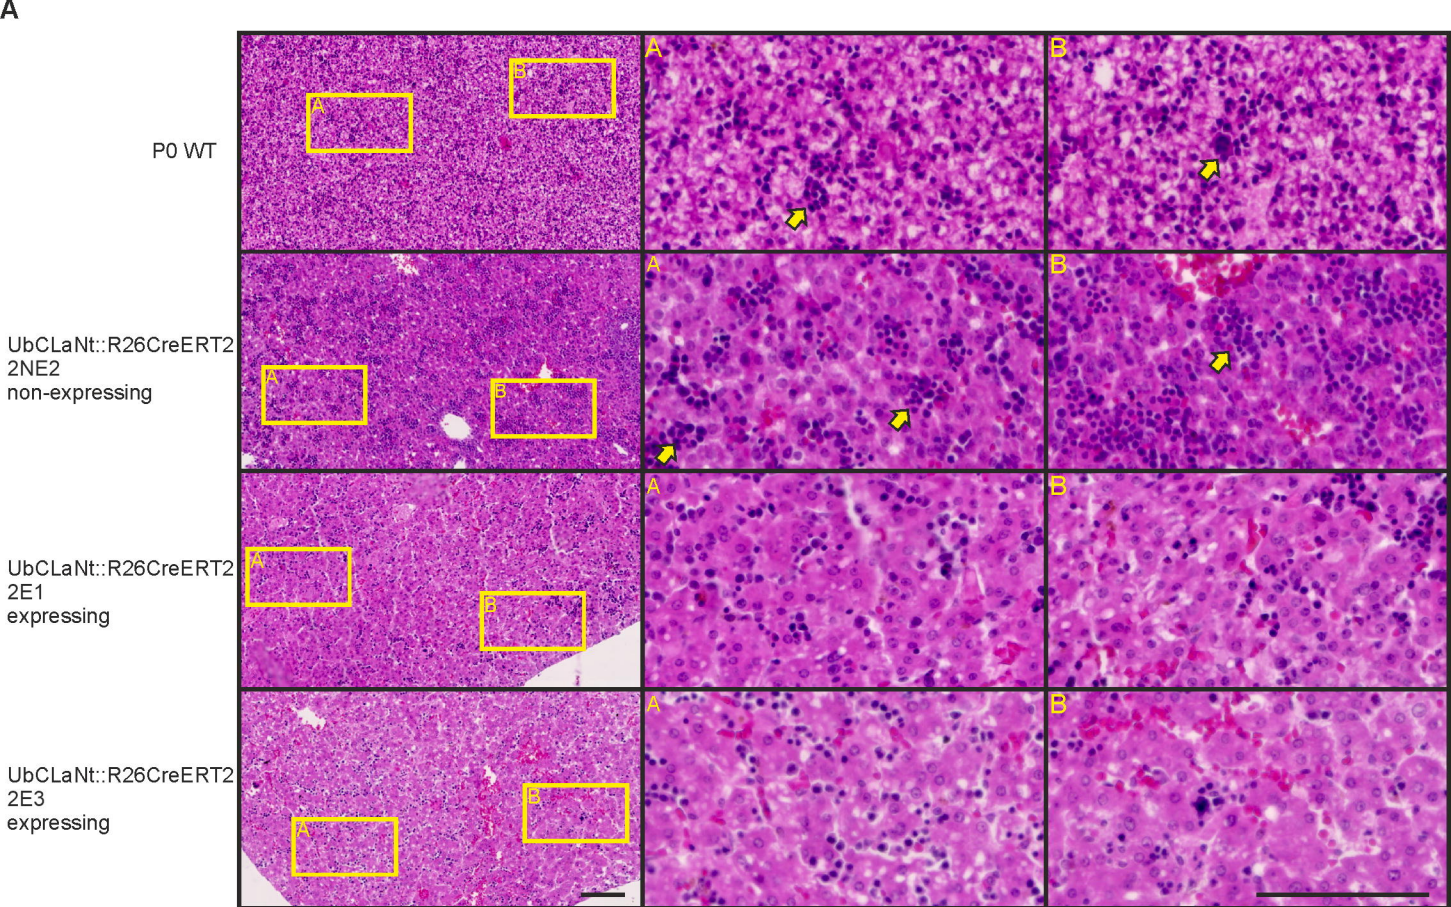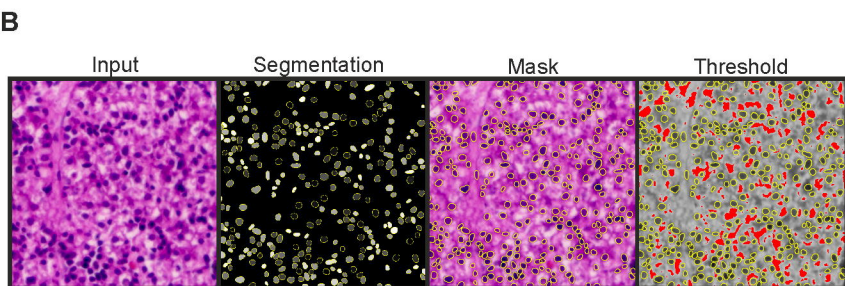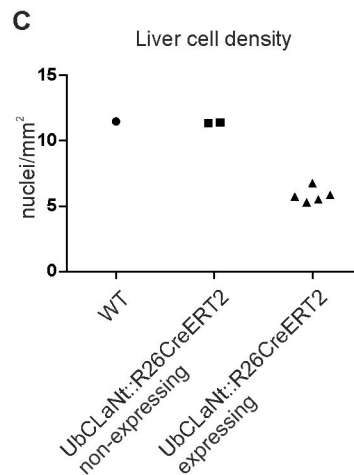

Source: https://www.biorxiv.org/content/10.1101/2020.07.26.221663v2.full.pdf
